# Supplementary material for: HNRNPH1-dependent splicing of a fusion oncogene reveals a targetable RNA G-quadruplex interaction
Source: PubMed Central journal article supplement — RNA. 2019 Dec;25(12):1731–50. doi: 10.1261/rna.072454.119 (PMC6859848; doi:10.1261/rna.072454.119), 2019-12
Supplement: supp_072454.119_Supplemental_Material.pdf [file supp_072454.119_Supplemental_Material.pdf]

## Supplemental Material

### **HNRNPH1-dependent splicing of a fusion oncogene reveals a targetable RNA G-quadruplex interaction**

Carla Neckles<sup>1</sup>, Robert Boer<sup>2</sup>, Nicholas Aborenden<sup>1</sup>, Allison M. Cross<sup>1</sup>, Robert L. Walker<sup>3</sup>, Bong-Hyun Kim<sup>4</sup>, Suntae Kim<sup>1</sup>, John S. Schneekloth Jr.<sup>2</sup>, Natasha J. Caplen<sup>1\*</sup>

<sup>1</sup> Functional Genetics Section, Genetics Branch, Center for Cancer Research, National Cancer Institute, Bethesda, MD, USA

<sup>2</sup> Chemical Biology Laboratory, Center for Cancer Research, National Cancer Institute, Frederick, MD 21702, USA

<sup>3</sup> Molecular Genetics Section, Genetics Branch, Center for Cancer Research, National Cancer Institute, Bethesda, MD, USA

<sup>4</sup> CCR Collaborative Bioinformatics Resource, Frederick National Laboratory for Cancer Research, Leidos Biomedical Research, Inc., Frederick, MD, 21702, USA

\* To whom correspondence should be addressed. Tel: 240-760-7366; Fax: 240-541-4481; Email: [ncaplen@mail.nih.gov](mailto:ncaplen@mail.nih.gov)

#### **Present Address:**

Bong-Hyun Kim, Bioinformatics Division, Kite, a Gilead Company, Santa Monica, CA 90404, USA  
Suntae Kim, Clinical Operations, KCRN Research, LLC, Germantown, MD 20874, USA

## METHODS

### Protein expression and purification by IMAC

Briefly, a glycerol stock of BL21(DE3) Star pRare *E. coli* cells transformed with appropriate plasmid was used to inoculate 3 ml of MDAG-135 medium in a 15-ml snap-cap polypropylene tube (Studier 2005). The seed culture was grown for 16 hours, shaking at 250 rpm and 37°C. A 500-ml baffled shake flask containing 100 ml Dynamite broth was inoculated with 2 ml of the seed (1:50 dilution of the production culture volume). The culture was grown in a 37°C shaker at 250 rpm to an OD<sub>600</sub> of 6.0-7.0 before shifting the temperature to 16°C. IPTG was added to a final concentration of 0.5 mM and the cultures were grown overnight for a total growth time of 24 hours after inoculation. The culture was centrifuged at 4,000 x *g* (Beckman JS-5.3 rotor) for 20 minutes at 4°C and the pellets were frozen at -80°C.

*E. coli* cell pellet was resuspended in a lysis buffer of 25 mM HEPES, pH 7.3, 375 mM NaCl, 1.25 mM TCEP, and Complete protease inhibitor (Sigma-Aldrich, St. Louis, MO) as per the manufacturer's instructions. The volume of lysis buffer was calculated based on achieving a final concentration of 100 OD units/ml. Each sample was lysed by a microfluidizer (Microfluidics, Newton, MA) and clarified at 100,000 x *g* for 30 minutes. The clarified supernatant was frozen at -80°C until purification. The clarified lysate was thawed at room temperature, filtered (0.45 micron), and adjusted to contain 50 mM imidazole. Using a Bio-Rad NGC FPLC, the sample was applied to a 2-mL HisTrap column (GE Healthcare, Chicago, IL) that had been pre-equilibrated in 20 mM HEPES, pH 7.3, 300 mM NaCl, 1 mM TCEP, 50 mM imidazole. The column was washed with the equilibration buffer to baseline. Proteins were eluted with a linear elution gradient to 500 mM imidazole over 20 column volumes, and the fractions analyzed by SDS-PAGE. Pooled fractions were dialyzed twice for at least 4 hours at 4°C against at least 20 sample volumes of 20 mM HEPES, pH 7.3, 300 mM NaCl, 1 mM TCEP using 3.5 kDa MWCO Snakeskin dialysis membrane (Pierce).

### CRISPR-Cas9-mediated mCherry tagging of *NR0B1* in TC32 cells

*Design of sgRNA and donor plasmid.* A sgRNA targeting the C-terminus of *NR0B1* (ACTGCACTACTGCACTTGTG) was designed using Benchling software (San Francisco, CA) and cloned into the Cas9-containing plasmid PX459 (plasmid #62988, Addgene, Cambridge, MA). Forward and reverse oligonucleotides (**Table S3**) containing the sgRNA sequence were

phosphorylated using T4 PNK (New England Biolabs, Ipswich, MA), annealed, and ligated into a *BbsI* digested PX459 plasmid using Quick Ligase (New England Biolabs).

The NR0B1-T2A-mCherry donor vector was generated by insertion of the left homology arm (X:30322699-30323598), right homology arm (X:30321796-30322695), and T2A-mCherry cassette into the pUC19 vector (plasmid #50005, Addgene) using Gibson Assembly® (New England Biolabs). Briefly, for generation of the left and right homology arms, TC32 genomic DNA was isolated using the Maxwell® 16 Cell LEV DNA purification kit (Promega, Madison, WI) and 900 bp fragments upstream and downstream of the stop codon in *NR0B1* exon 2 were amplified using two sequential PCR reactions. To allow for linearization of the donor vector after co-transfection with the CRISPR-Cas9 plasmid (Zhang et al. 2017), the primers used in the initial round of amplification contained adapters for the sgRNA sequence at the 5' end of the left homology arm and the 3' end of the right homology arm (**Table S3**). Primers containing 30 bp of the overlapping sequence to *HincII*-digested pUC19 were used in the second round of amplification and are listed in **Table S3**. Similarly, the T2A-mCherry cassette was amplified from the Cas9-T2A-mCherry plasmid (plasmid #64324, Addgene) using primers containing 30 bp overlap to the adjacent homology arm and are listed in **Table S3**. All PCR fragments were amplified using Platinum™ PCR SuperMix High Fidelity (Invitrogen) and gel purified (Qiagen). Plasmids were sequenced using the Sanger method (CCR Genomics Core, CCR, NCI).

*Generation of TC32 cells expressing mCherry tagged NR0B1.* TC32 cells ( $6 \times 10^5$ ) were resuspended with 4  $\mu$ g donor plasmid and 6  $\mu$ g of sgRNA-containing PX459 plasmid in Nucleofector solution R (Lonza, Walkersville, MD) and electroporated using the D-032 program of the Amaxa Nucleofector II (Lonza). Following electroporation, cells were treated with a non-homologous end joining inhibitor, 1  $\mu$ M SCR7 pyrazine (Sigma-Aldrich), for 24 hours to enhance the efficiency of CRISPR-Cas9 genome editing. We expanded the electroporated cells, and bulk sorted for mCherry expression on a BD FACSAria™ fusion flow cytometer (BD Biosciences, San Jose, CA).

## TABLES AND FIGURES

Table S1. Sequences of RNAs used in this study

| Vendor                      | Application                                                                                     | RNA samples | Sequence (5' – 3')           | Modifications      |
|-----------------------------|-------------------------------------------------------------------------------------------------|-------------|------------------------------|--------------------|
| Integrated DNA Technologies | EMSA, antibody-based RNA-binding assay, CD scans, Thioflavin T assays, and transfection studies | rG1         | ACCGGGGCAGGGGAAGAGGGGGAUU    | 3'-biotinylation   |
|                             |                                                                                                 | rG1 mt 1    | ACCGAAGCAGAAGAAGAGAAGGAUU    |                    |
|                             |                                                                                                 | rG2a        | AGCAGAGGUGGGCGGGGAGGAGGAC    |                    |
|                             |                                                                                                 | rGa mt 1    | AGCAGAGGUAAGCGAAGAAAAGGAC    |                    |
|                             |                                                                                                 | rG2b        | GUGGGCGGGGAGGAGGACGCGGUGGAUU |                    |
|                             |                                                                                                 | rG2b mt 1   | GUAAGCGGAAAGGAAAACGCAAUGGAUU |                    |
|                             |                                                                                                 | Linker      | GAUCGUGGAGGCAUGAGCAGAGGUG    |                    |
| Dharmacon                   | Fluorescent intensity assay                                                                     | rG1         | ACCGGGGCAGGGGAAGAGGGGG       | 5'-Alexa Fluor 647 |
|                             | Surface plasmon resonance studies and CD melt curves                                            | rG1         | ACCGGGGCAGGGGAAGAGGGGG       | 5'-biotinylation   |
|                             |                                                                                                 | rG1 mt 1    | ACCGAAGCAGAAGAAGAGAAGGAUU    |                    |

Table S2. siRNA sequences

| siRNA      | Vendor | Vendor ID  | Sequence (5' – 3')    |
|------------|--------|------------|-----------------------|
| siNegative | Qiagen | SI03650318 | Proprietary           |
| siFLI1     | Ambion | s5266      | CAAACGAUCAGUAAGAAUAtt |
| siHNRNPH1  | Ambion | s6730      | GGAUUUGGGUCAGAUAGAUtt |
| siHNRNPH2  | Ambion | 145362     | GCACUAAAUAGCUACUCCAtt |
| siHNRNPF   | Qiagen | SI00300461 | AAGCGTTCGTGCAGTTTGCCT |

**Table S3. qPCR primers – EWS-FLI1, RNAi targets, Reference genes**

| Gene target                                        | Gene symbol                | Primer                                        | Primer sequence (5' – 3')                                                                   | Amplicon length (bp)                                                                                                                                                                                                                                                                                |
|----------------------------------------------------|----------------------------|-----------------------------------------------|---------------------------------------------------------------------------------------------|-----------------------------------------------------------------------------------------------------------------------------------------------------------------------------------------------------------------------------------------------------------------------------------------------------|
| RNAi targets                                       | <i>HNRNPH1</i>             | Hs_HNRNPH1 F                                  | TACACATGCGGGGATTACCTT                                                                       | 120<br>(ENST00000639490.1,<br>ENST00000644339.1,<br>ENST00000393432.8,<br>ENST00000356731.9,<br>ENST00000639162.1,<br>ENST00000329433.10,<br>ENST00000643310.1,<br>ENST00000523921.1,<br>ENST00000519033.5,<br>ENST00000442819.6,<br>ENST00000638505.1,<br>ENST00000521173.5,<br>ENST00000510411.5) |
|                                                    |                            | Hs_HNRNPH1 R                                  | CTTACCAGTTACTCTGCCATC                                                                       |                                                                                                                                                                                                                                                                                                     |
|                                                    | <i>HNRNPH2</i>             | Hs_HNRNPH2 F                                  | GAAGCATAACAGGTCCGAATAGC                                                                     | 159<br>(ENST00000316594.5)                                                                                                                                                                                                                                                                          |
|                                                    |                            | Hs_HNRNPH2 R                                  | CGCCCCTGAAAGTCCACTG                                                                         |                                                                                                                                                                                                                                                                                                     |
|                                                    | <i>HNRNPF</i>              | Hs_HNRNPF_1<br>_SG QuantiTect<br>Primer Assay | NM_001098204,<br>NM_001098205,<br>NM_001098206,<br>NM_001098207,<br>NM_001098208, NM_004966 | 150 (all variants)                                                                                                                                                                                                                                                                                  |
| EWS-FLI1 7/6<br>and 7/5 fusions                    | <i>EWS-FLI1</i><br>(EF7-7) | EWSR1 exon 7<br>F                             | ATCCTACAGCCAAGCTCCAA                                                                        | type 1 (7/6): 177<br>type 2 (7/5): 243                                                                                                                                                                                                                                                              |
|                                                    |                            | FLI1 exon 7 R                                 | GGCCGTTGCTCTGTATTCTTAC                                                                      |                                                                                                                                                                                                                                                                                                     |
| Protein-coding<br>EWSR1<br>variants<br>(EWSR1-001) | <i>EWSR1</i><br>(EE7-9/10) | EWSR1 exon 7<br>F                             | ATCCTACAGCCAAGCTCCAA                                                                        | 279 (NM_013986, and<br>NM_001163285)<br>282 (NM_001163286,<br>and NM_005243)                                                                                                                                                                                                                        |
|                                                    |                            | EWSR1 exon<br>9/10 R                          | GGTCCACCAGGCTTATTGAA                                                                        |                                                                                                                                                                                                                                                                                                     |
| Reference<br>genes                                 | <i>ACTB</i>                | Hs_ACTB F                                     | GGCACCCAGCACAAATGAAG                                                                        | 66<br>(ENST00000464611.1,<br>ENST00000493945.6,<br>ENST00000646664.1)                                                                                                                                                                                                                               |
|                                                    |                            | Hs_ACTB R                                     | CCGATCCACACGGAGTACTTG                                                                       |                                                                                                                                                                                                                                                                                                     |
|                                                    | <i>RPL27</i>               | Hs_RPL27 F                                    | ATCGCCAAGAGATCAAAGATAA                                                                      | 123<br>(ENST00000253788.11,<br>ENST00000589913.6,<br>ENST00000589037.5,<br>ENST00000586277.5)                                                                                                                                                                                                       |
|                                                    |                            | Hs_RPL27 R                                    | TCTGAAGACATCCTTATTGACG                                                                      |                                                                                                                                                                                                                                                                                                     |
|                                                    | <i>NACA</i>                | Hs_NACA F                                     | TGGAACAGAATCTGACAGTGATG                                                                     | 82<br>(ENST00000356769.7,<br>ENST00000546392.5,<br>ENST00000549855.5,<br>ENST00000546862.5,<br>ENST00000550920.5,<br>ENST00000552055.5,<br>ENST00000550952.5,<br>ENST00000454682.5,<br>ENST00000549259.5,<br>ENST00000393891.8,<br>ENST00000552540.5,<br>ENST00000548563.5)                         |
|                                                    |                            | Hs_NACA_R                                     | CTGGGCTTGTTGTGTGGTTG                                                                        |                                                                                                                                                                                                                                                                                                     |

|                          |               |             |                         |                                                                                                                                         |
|--------------------------|---------------|-------------|-------------------------|-----------------------------------------------------------------------------------------------------------------------------------------|
| EWS-FLI1<br>target genes | <i>NR0B1</i>  | Hs_NR0B1 F  | AGCACAAATCAAGCGCAGG     | 150<br>(ENST00000378970.4)                                                                                                              |
|                          |               | Hs_NR0B1 R  | GAAGCGCAGCGTCTTCAAC     |                                                                                                                                         |
|                          | <i>PRKCB</i>  | Hs_PRKCB F  | AGCCCCACGTTTTGTGACC     | 117<br>(ENST00000643927.1,<br>ENST00000321728.12)                                                                                       |
|                          |               | Hs_PRKCB R  | GCTGGGAACATTCATCACGC    |                                                                                                                                         |
|                          | <i>VRK1</i>   | Hs_VRK1 F   | TGCACCTTGTGTTGTAAAAGTGG | 81<br>(ENST00000216639.7)                                                                                                               |
|                          |               | Hs_VRK1 R   | TTTGAGCTCGTTGGTAGAAC    |                                                                                                                                         |
|                          | <i>GRK5</i>   | Hs_GRK5 F   | CCAACACGGTCTTGCTGAAAG   | 133<br>(ENST00000392870.2)                                                                                                              |
|                          |               | Hs_GRK5 R   | TCTCTGTCTATGGTCTTCGG    |                                                                                                                                         |
|                          | <i>FCGRT</i>  | Hs_FCGRT F  | CAACAAGGAGCTCACCTTCC    | 92<br>(ENST00000593381.5,<br>ENST00000426395.7,<br>ENST00000221466.9)                                                                   |
|                          |               | Hs_FCGRT R  | GCTCCTTCCACTCCAGGTTT    |                                                                                                                                         |
|                          | <i>NKX2.2</i> | Hs_NKX2.2 F | TCTACGACAGCAGCGACAAC    | 74<br>(ENST00000377142.4)                                                                                                               |
|                          |               | Hs_NKX2.2 R | ACCGTGCAGGGAGTACTGAA    |                                                                                                                                         |
|                          | <i>EZH2</i>   | Hs_EZH2 F   | GGACCACAGTGTTACCAGCAT   | 79<br>(ENST00000350995.6,<br>ENST00000483967.5,<br>ENST00000320356.6,<br>ENST00000460911.5,<br>ENST00000478654.5,<br>ENST00000476773.5) |
|                          |               | Hs_EZH2 R   | GTGGGGTCTTTATCCGCTCAG   |                                                                                                                                         |
|                          | <i>CDKN1A</i> | Hs_CDKN1A F | TGTCCGTCAGAACCCATGC     | 139<br>(ENST00000405375.5,<br>ENST00000615513.4,<br>ENST00000244741.9,<br>ENST00000373711.3,<br>ENST00000448526.6)                      |
|                          |               | Hs_CDKN1A R | AAAGTCGAAGTTCATCGCTC    |                                                                                                                                         |
|                          | <i>PHLDA1</i> | Hs_PHLDA1 F | GGAGATCGACTTTCGGTGCC    | 85<br>(ENST00000602540.5,<br>ENST00000266671.9,<br>ENST00000619060.1)                                                                   |
|                          |               | Hs_PHLDA1 R | GGCCTGACGATTCTTGTACTG   |                                                                                                                                         |
|                          | <i>FOXO1</i>  | Hs_FOXO1 F  | GGATGTGCATTCTATGGTGTACC | 86<br>(ENST00000379561.5)                                                                                                               |
|                          |               | Hs_FOXO1 R  | TTTCGGGATTGCTTATCTCAGAC |                                                                                                                                         |
|                          | <i>FOSL2</i>  | Hs_FOSL2 F  | CAGAAATTCGGGTAGATATGCC  | 130<br>(ENST00000379619.5,<br>ENST00000436647.1,<br>ENST00000264716.8)                                                                  |
|                          |               | Hs_FOSL2 R  | GGTATGGGTTGGACATGGAGG   |                                                                                                                                         |

**Table S4. PCR primers – Primers for splicing assay, sequencing and the design of sgRNA and donor plasmids**

|                                                | Application                   | Primer                                                  | Primer sequence (5' – 3')                                 | PCR product size (bp) |
|------------------------------------------------|-------------------------------|---------------------------------------------------------|-----------------------------------------------------------|-----------------------|
|                                                | Sequencing                    | T3 TAG                                                  | ATTAACCCTCACTAAAGGG                                       | N/A                   |
|                                                |                               | T7 TAG                                                  | AATACGACTCACTATAGG                                        |                       |
| <i>EWS-FLI1</i> (EF7-7)                        | Splicing assay                | EWSR1 exon 7 F                                          | ATCCTACAGCCAAGCTCCAA                                      | 177                   |
|                                                |                               | FLI1 exon 7 R                                           | GGCCGTTGCTCTGTATTCTTAC                                    |                       |
| <i>EWS-FLI1</i> (EF7-8)                        | Splicing assay and sequencing | EWSR1 exon 7 F                                          | TATTCCTCTACACAGCCGACTAGTTATGAT                            | 377                   |
|                                                |                               | FLI1 exon 7 R                                           | GCTAGGCGACTGCTGGTC                                        |                       |
| <i>EWS-FLI1</i> (EF7-8)                        | Sequencing                    | T7- EWSR1 exon 7 F                                      | AATACGACTCACTATAGGTATTCCTCTACAC<br>AGCCGACTAGTTATGAT      | 414                   |
|                                                |                               | T3-FLI1 exon 7 R                                        | ATTAACCCTCACTAAAGGGGCTAGGCGACTG<br>CTGGTC                 |                       |
| sgRNA targeting the C-terminus of <i>NROB1</i> | sgRNA plasmid                 | sgRNA F                                                 | CACCGACTGCACTACTGCACTTGTG                                 | N/A                   |
|                                                |                               | sgRNA R                                                 | AAACCACAAGTGCAGTAGTGCAGTC                                 |                       |
| Left homology arm (LHA)                        | Donor plasmid                 | LHA_first round F                                       | ACTGCACTACTGCACTTGTGTGGTTTTGAAC<br>ACTCATTAGAATCATTCTT    | First round PCR: 953  |
|                                                |                               | LHA_second round F                                      | GATTACGCCAAGCTTGCATGCCTGCAGGTCA<br>CTGCACTACTGCACTTGTGTGG | Second round PCR: 983 |
|                                                |                               | LHA R                                                   | ACCGCATGTTAGCAGACTTCCTCTGCCCTCT<br>ATCTTTGTACAGAGCATTTCCA |                       |
| Right homology arm (RHA)                       |                               | RHA_F                                                   | ACCGGCGGCATGGACGAGCTGTACAAGTAAA<br>GTCATGTGGGGCACACA      | First round PCR: 953  |
|                                                |                               | RHA_first round R                                       | ACTGCACTACTGCACTTGTGTGGATAGACAT<br>ATAGTAGCCTTGATTTT      | Second round PCR: 983 |
|                                                |                               | RHA_second round R                                      | GAGCTCGGTACCCGGGGATCCTCTAGAGTCA<br>CTGCACTACTGCACTTGTGTGG |                       |
| mCherry cassette                               | T2A-mCherry cassette F        | ATGATGCTGAAAATGCTCTGTACAAAGATAG<br>AGGGCAGAGGAAGTCTG    | 831                                                       |                       |
|                                                | T2A-mCherry cassette R        | CACTACTGCACTTGTGTGCCCCACATGACTT<br>TACTTGTACAGCTCGTCCAT |                                                           |                       |
| CRISPR plasmid sgRNA                           | Sequencing                    | Human U6 promoter F                                     | GACTATCATATGCTTACCGT                                      | N/A                   |
| pUC19 vector                                   | Sequencing                    | pUC19_Addgene# 50005_M13 F                              | AGCGGATAACAATTTACACAGG                                    | N/A                   |
|                                                |                               | pUC19_Addgene# 50005_M13 R                              | CCCAGTCACGACGTTGTAAAACG                                   |                       |
| Donor plasmid                                  | Sequencing                    | LHA-T2A mCherry_junction primer                         | GGGAAGCTCAGCAAATACTCAGTG                                  | N/A                   |
|                                                |                               | mCherry_RHA_junction primer                             | GACTACTTGAAGCTGTCCTTCC                                    |                       |

**Table S5. Sequences of DNA used to express truncated HNRNPH1 proteins**

\*Numbering based on wild-type HNRNPH1 protein sequence

| Domain  | Sequence (5' to 3')                                                                                                                                                                                                                                                                                                                                                                                                                                                             | Encoded protein                                                                                                                                                                                                                                                           | Residues* |
|---------|---------------------------------------------------------------------------------------------------------------------------------------------------------------------------------------------------------------------------------------------------------------------------------------------------------------------------------------------------------------------------------------------------------------------------------------------------------------------------------|---------------------------------------------------------------------------------------------------------------------------------------------------------------------------------------------------------------------------------------------------------------------------|-----------|
| qRRM1   | ATGAGATCTGGATCCCACCATCACCATCAC<br>CATAGATCTGATATCACAAGTTTGTACAAA<br>AAAGTTGGCGAAAACCTGTACTTCCAAGGC<br>ATGTTGGGCACGGAAGGTGGAGAGGGATTC<br>GTGGTGAAGGTCCGGGGCTTGCCCTGGTCT<br>TGCTCGGCCGATGAAGTGCAGAGGTTTTTT<br>TCTGACTGCAAAATTCAAATGGGGCTCAA<br>GGTATTCGTTTCATCTACACCAGAGAAGGC<br>AGACCAAGTGGCGAGGCTTTTGTGAACTT<br>GAATCAGAAGATGAAGTCAAATGGCCCTG<br>AAAAAAGACAGAGAACTATGGGACACAGA<br>TATGTTGAAGTATTCAAGTCAAACAACGTT<br>GAAATGGATTGGGTGTTGAAGCATACTGGT<br>CCATAA                    | MRS GSHHHHHHRS DITS LYKKVGE<br>NLYFQGM LGTEGGEGFVVKVRGLP<br>WCSADEVQRFFSDCKIQNGAQGI<br>RFIY TREGRPSGEAFVELESEDEV<br>KLALKKDRETMGHRYVEVFKSNNV<br>EMDWVLKHTGP                                                                                                               | 1-102     |
| qRRM2   | ATGAGATCTGGATCCCACCATCACCATCAC<br>CATAGATCTGATATCACAAGTTTGTACAAA<br>AAAGTTGGCGAAAACCTGTACTTCCAAGGC<br>AATAGTCCTGACACGGCCAATGATGGCTTT<br>GTACGGCTTAGAGGACTTCCCTTTGGATGT<br>AGCAAGGAAGAAATTGTTCAAGTTCTTCTCA<br>GGGTTGGAAATCGTGCCAAATGGGATAACA<br>TTGCCGGTGGACTTCCAGGGGAGGAGTACG<br>GGGGAGGCCTTCGTGCAGTTTGCTTACAG<br>GAAATAGCTGAAAAGGCTCTAAAGAAACAC<br>AAGGAAAGAATAGGGCACAGGTATATTGAA<br>ATCTTTAAGAGCAGTAGAGCTGAAGTTAGA<br>ACTCATTAA                                               | MRS GSHHHHHHRS DITS LYKKVGE<br>NLYFQGN SPDTANDGFVRLRGLPF<br>GCSKEEIVQFFSGL EIVPNGITLP<br>VDFQGRSTGEAFVQFASQEIAEKA<br>LKKHKERIGHRYIEIFKSSRAEVR<br>TH                                                                                                                       | 103-194   |
| qRRM3   | ATGAGATCTGGATCCCACCATCACCATCAC<br>CATAGATCTGATATCACAAGTTTGTACAAA<br>AAAGTTGGCGAAAACCTGTACTTCCAAGGC<br>GGGGATGGTGGCTCTACTTCCAGAGCACA<br>ACAGGACACTGTGTACACATGCGGGGATTA<br>CCTTACAGAGCTACTGAGAATGACATTTAT<br>AATTTTTTTTTCCACCGCTCAACCCTGTGAGA<br>GTACACATTGAAATTGGTCTGATGGCAGA<br>GTAAGTGGTGAAGCAGATGTCGAGTTCGCA<br>ACTCATGAAGATGCTGTGGCAGCTATGTCA<br>AAAGACAAAGCAAATATGCAACACAGATAT<br>GTAGA ACTCTTCTTGAATTCTACAGCAGGA<br>GCAAGCGGTGGTGTCTTACGAACACAGATAT<br>GTAGA ACTCTTCTTGTAA | MRS GSHHHHHHRS DITS LYKKVGE<br>NLYFQGGDGGSTFQSTTGHCVHMR<br>GLPYRATENDIYNFFSPLNPFVRVH<br>IEIGPDGRVTGEADVEFATHEDAV<br>AAMSKDKANMQHRYVELFLNSTAG<br>ASGGAYEHRYVELFL                                                                                                           | 277-381   |
| qRRM1-2 | ATGAGATCTGGATCCCACCATCACCATCAC<br>CATAGATCTGATATCACAAGTTTGTACAAA<br>AAAGTTGGCGAAAACCTGTACTTCCAAGGC<br>ATGTTGGGCACGGAAGGTGGAGAGGGATTC<br>GTGGTGAAGGTCCGGGGCTTGCCCTGGTCT<br>TGCTCGGCCGATGAAGTGCAGAGGTTTTTT<br>TCTGACTGCAAAATTCAAATGGGGCTCAA<br>GGTATTCGTTTCATCTACACCAGAGAAGGC<br>AGACCAAGTGGCGAGGCTTTTGTGAACTT<br>GAATCAGAAGATGAAGTCAAATGGCCCTG<br>AAAAAAGACAGAGAACTATGGGACACAGA<br>TATGTTGAAGTATTCAAGTCAAACAACGTT                                                                | MRS GSHHHHHHRS DITS LYKKVGE<br>NLYFQGM LGTEGGEGFVVKVRGLP<br>WCSADEVQRFFSDCKIQNGAQGI<br>RFIY TREGRPSGEAFVELESEDEV<br>KLALKKDRETMGHRYVEVFKSNNV<br>EMDWVLKHTGPN SPDTANDGFVRL<br>RGLPFGCSKEEIVQFFSGL EIVPN<br>GITLPVDFQGRSTGEAFVQFASQE<br>IAEKALKKHKERIGHRYIEIFKSS<br>RAEVRTH | 1-194     |



|         |                                                                                                                                                                                                                                                                                                                                                                                                                                                                                                                                                                                                                                                                                                                                                                                                                                                                                                                                                                                                                     |                                                                                                                                                                                                                                                                                                                                                                                                                                                         |         |
|---------|---------------------------------------------------------------------------------------------------------------------------------------------------------------------------------------------------------------------------------------------------------------------------------------------------------------------------------------------------------------------------------------------------------------------------------------------------------------------------------------------------------------------------------------------------------------------------------------------------------------------------------------------------------------------------------------------------------------------------------------------------------------------------------------------------------------------------------------------------------------------------------------------------------------------------------------------------------------------------------------------------------------------|---------------------------------------------------------------------------------------------------------------------------------------------------------------------------------------------------------------------------------------------------------------------------------------------------------------------------------------------------------------------------------------------------------------------------------------------------------|---------|
|         | GAAATGGATTGGGTGTTGAAGCATACTGGT<br>CCAAATAGTCCTGACACGGCCAATGATGGC<br>TTTGTACGGCTTAGAGGACTTCCCTTTGGA<br>TGTAGCAAGGAAGAAATTGTTTCAGTTCTTC<br>TCAGGGTTGGAAATCGTGCCAAATGGGATA<br>ACATTGCCGGTGGACTTCCAGGGGAGGAGT<br>ACGGGGGAGGCCTTCGTGCAGTTTGCTTCA<br>CAGGAAATAGCTGAAAAGGCTCTAAAGAAA<br>CACAAGGAAAGAATAGGGCACAGGTATATT<br>GAAATCTTTAAGAGCAGTAGAGCTGAAGTT<br>AGAACTCATTAA                                                                                                                                                                                                                                                                                                                                                                                                                                                                                                                                                                                                                                                   |                                                                                                                                                                                                                                                                                                                                                                                                                                                         |         |
| qRRM2-3 | ATGAACTCTCCGGATACTGCTAATGATGGT<br>TTCGTACGTCTGCGTGGTCTGCCATTCGGT<br>TGTTCTAAAGAGGAGATCGTTTCAGTTCTTC<br>TCTGGCCTGGAGATCGTACCGAACGGCATC<br>ACCCTGCCGGTGGACTTTTCAGGGTCGTTCT<br>ACTGGCGAAGCATTTCGTTTCAGTTTCGCTTCC<br>CAGGAAATCGCAGAGAAAGCCCTGAAGAAA<br>CACAAAGAGCGTATCGGTCATCGTTACATT<br>GAAATCTTCAAATCTTCCCGTGCTGAGGTG<br>CGTACCCATTACGATCCACCACGTAAACTG<br>ATGGCTATGCAACGTCCGGGTCCGTACGAC<br>CGTCCGGGTGCCGGTCCGGTTACAACCTCT<br>ATCGGTCGCGGTGCTGGCTTCGAACGTATG<br>CGTCGTGGTGCATATGGTGGTGGTTACGGT<br>GGTTACGATGACTATAACGGCTACAACGAT<br>GGCTATGGCTTCGGCTCTGACCGCTTCGGT<br>CGCGACCTGAACTACTGCTTCTCTGGTATG<br>TCCGATCACCGTTACGGTGATGGTGGCTCC<br>ACCTTTCAGAGCACCACTGGTCACTGTGTT<br>CACATGCGTGGCCTGCCGTACCGTGCAACT<br>GAGAACGACATCTATAACTTCTTCTCTCCG<br>CTGAACCCGGTTCGTGTTTCATATTGAGATC<br>GGTCCGGATGGCCGTGTGACTGGTGAAGCC<br>GACGTTGAGTTCGCAACCCATGAGGACGCT<br>GTAGCTGCGATGTCCAAAGATAAAGCTAAC<br>ATGCAGCATCGCTATGTTGAGCTGTTCTCTG<br>AACAGCACTGCTGGCGCTTCTGGTGGTGCT<br>TACGAACATCGCTATGTAGAAGTGTTCCTG<br>CACCATCACCATCACCCTAA | MNSPDTANDGFVRLRGLPFGCSKE<br>EIVQFFSGLIIVPNGITLPVDFQG<br>RSTGEAFVQFASQEI AEKALKKHK<br>ERIGHRYIEIFKSSRAEVRTHYDP<br>PRKLMAMQRP GPYDRPGAGRGYNS<br>IGRGAGFERMRRGAYGGGYGGYDD<br>YNGYNDGYGFGSDRFRDLNYCFS<br>GMSDHRYGDGGSTFQSTTGHCVHM<br>RGLPYRATENDIYNFFSPLNPVRV<br>HIEIGPDGRVTGEADVEFATHEDA<br>VAAMSKDKANMQHRYVELFLNSTA<br>GASGGAYEHRYVELFLHHHHHH                                                                                                             | 103-381 |
| Δ1-103  | <b>HNRNPH1-13871H (Creative BioMart)</b>                                                                                                                                                                                                                                                                                                                                                                                                                                                                                                                                                                                                                                                                                                                                                                                                                                                                                                                                                                            | MGSSHHHHHHSSGLVPRGSHMASM<br>TGGQQMGRGSSPDTANDGFVRLRG<br>LPFGCSKEEIVQFFSGLIIVPNGI<br>TLPVDFQGRSTGEAFVQFASQEI A<br>EKALKKHKERIGHRYIEIFKSSRA<br>EVRTHYDPPRKLMAMQRP GPYDRP<br>GAGRGYNSIGRGAGFERMRRGAYG<br>GGYGGYDDYNGYNDGYGFGSDRFG<br>RDLNYCFSGMSDHRYGDGGSTFQS<br>TTGHCVHMRGLPYRATENDIYNFF<br>SPLNPVRVHIEIGPDGRVTGEADV<br>EFATHEDAVAAMSKDKANMQHRYV<br>ELFLNSTAGASGGAYEHRYVELFL<br>NSTAGASGGAYGSQMMGGLSNQ<br>SSYGGPASQQLSGGYGGYGGQSS<br>MSGYDQVLQENSSDFQSNIA | 104-449 |

**Table S6. Homo sapiens *EWSR1* transcripts from the GRCh37 assembly - ENSG00000182944**

| Name      | Transcript ID     | bp   | Protein    | Biotype         | CCDS      | UniProt          | RefSeq                                                                                                           |
|-----------|-------------------|------|------------|-----------------|-----------|------------------|------------------------------------------------------------------------------------------------------------------|
| EWSR1-001 | ENST00000397938.2 | 2654 | 656aa      | Protein coding  | CCDS13851 | Q01844           | NM_001163285<br>NM_001163286<br>NM_005243<br>NM_013986<br>NP_001156757<br>NP_001156758<br>NP_005234<br>NP_053733 |
| EWSR1-002 | ENST00000406548.1 | 2207 | 655aa      | Protein coding  | CCDS54513 | Q01844           | -                                                                                                                |
| EWSR1-021 | ENST00000414183.2 | 2189 | 661aa      | Protein coding  | CCDS13852 | Q01844           | -                                                                                                                |
| EWSR1-008 | ENST00000332035.6 | 1989 | 600aa      | Protein coding  | CCDS54514 | B0QYJ7<br>Q01844 | -                                                                                                                |
| EWSR1-004 | ENST00000333395.6 | 1265 | 354aa      | Protein coding  | CCDS54512 | Q01844           | NM_001163287<br>NP_001156759                                                                                     |
| EWSR1-201 | ENST00000332050.6 | 2443 | 583aa      | Protein coding  | -         | C9JGE3           | -                                                                                                                |
| EWSR1-007 | ENST00000331029.7 | 2267 | 618aa      | Protein coding  | -         | B0QYK0           | -                                                                                                                |
| EWSR1-019 | ENST00000360091.3 | 1289 | 308aa      | Protein coding  | -         | -                | -                                                                                                                |
| EWSR1-013 | ENST00000437155.2 | 933  | 292aa      | Protein coding  | -         | F8WC90           | -                                                                                                                |
| EWSR1-018 | ENST00000455726.1 | 710  | 233aa      | Protein coding  | -         | B0QYJ7           | -                                                                                                                |
| EWSR1-017 | ENST00000415761.1 | 587  | 180aa      | Protein coding  | -         | B0QYJ6           | -                                                                                                                |
| EWSR1-014 | ENST00000447973.1 | 582  | 166aa      | Protein coding  | -         | B0QYJ4           | -                                                                                                                |
| EWSR1-016 | ENST00000444626.1 | 560  | 77aa       | Protein coding  | -         | B0QYJ5           | -                                                                                                                |
| EWSR1-012 | ENST00000436425.1 | 553  | 156aa      | Protein coding  | -         | B0QYJ3           | -                                                                                                                |
| EWSR1-005 | ENST00000479135.1 | 7285 | No protein | Retained intron | -         | -                | -                                                                                                                |
| EWSR1-006 | ENST00000483415.1 | 3231 | No protein | Retained intron | -         | -                | -                                                                                                                |
| EWSR1-009 | ENST00000469669.1 | 2630 | No protein | Retained intron | -         | -                | -                                                                                                                |
| EWSR1-011 | ENST00000490315.1 | 2301 | No protein | Retained intron | -         | -                | -                                                                                                                |
| EWSR1-010 | ENST00000483629.1 | 1818 | No protein | Retained intron | -         | -                | -                                                                                                                |
| EWSR1-015 | ENST00000493426.1 | 581  | No protein | Retained intron | -         | -                | -                                                                                                                |
| EWSR1-003 | ENST00000485037.1 | 479  | No protein | Retained intron | -         | -                | -                                                                                                                |

**Table S7** qPCR additional experimental details (see separate pdf)

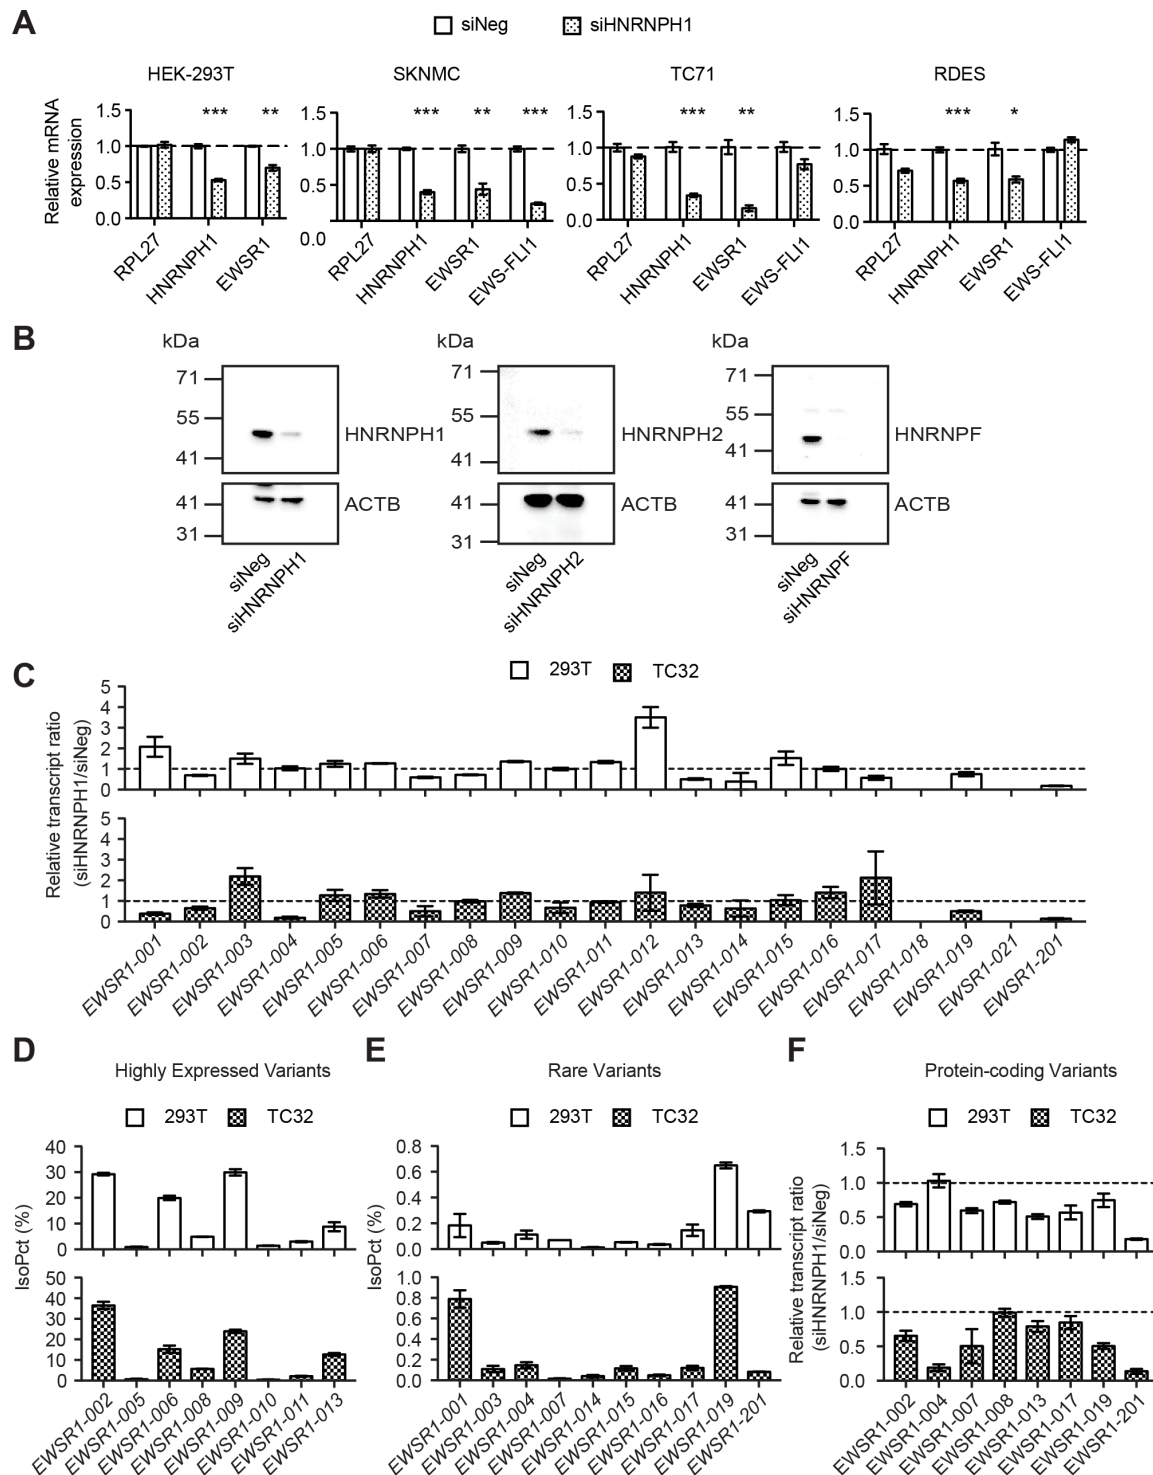

**Figure S1 related to Figure 1. HNRNPH1-mediated processing of *EWSR1* exon 8 containing pre-mRNAs.**

(A) qPCR assessment of *RPL27* (control), *HNRNPH1*, *EWS-FLI1* and *EWSR1* mRNA expression in *HNRNPH1*-silenced EWS cell lines (SKMNC, TC71 and RD-ES) and HEK-293T cells. Data

normalized to *ACTB* are expressed relative to siNeg-transfected cells (48 hours, mean  $\pm$  SEM, n=3). \*  $p < 0.05$ ; \*\*  $p < 0.01$ ; \*\*\*  $p < 0.001$  compared to siNeg-transfected cells. For additional experimental details, refer to **Table S7**.

(B) Immunoblot analysis of whole cell lysates prepared from TC32 EWS cells 48 hours post transfection of *HNRNPH1*, *HNRNPH2*, and *HNRNPF* siRNAs using antibodies against the proteins indicated.

(C) Expression of all *EWSR1* transcript variants from targeted RNA-seq data analyzed using RSEM for *HNRNPH1*-transfected HEK-293T cells (top) and TC32 EWS cells (bottom). Data are expressed relative to siNeg-transfected cells (48 hours, mean  $\pm$  SEM, n=3).

(D) Expression of highly expressed *EWSR1* transcript variants from targeted RNA-seq data analyzed using RSEM for *HNRNPH1*-transfected HEK-293T cells (top) and TC32 EWS cells (bottom). Data are expressed relative to siNeg-transfected cells (48 hours, mean  $\pm$  SEM, n=3).

(E) Expression of rare *EWSR1* transcript variants from targeted RNA-seq data analyzed using RSEM for *HNRNPH1*-transfected HEK-293T cells (top) and TC32 EWS cells (bottom). Data are expressed relative to siNeg-transfected cells (48 hours, mean  $\pm$  SEM, n=3).

(F) Expression of protein-coding *EWSR1* transcript variants from targeted RNA-seq data analyzed using RSEM for *HNRNPH1*-transfected HEK-293T cells (top) and TC32 EWS cells (bottom). Data are expressed relative to siNeg-transfected cells (48 hours, mean  $\pm$  SEM, n=3).

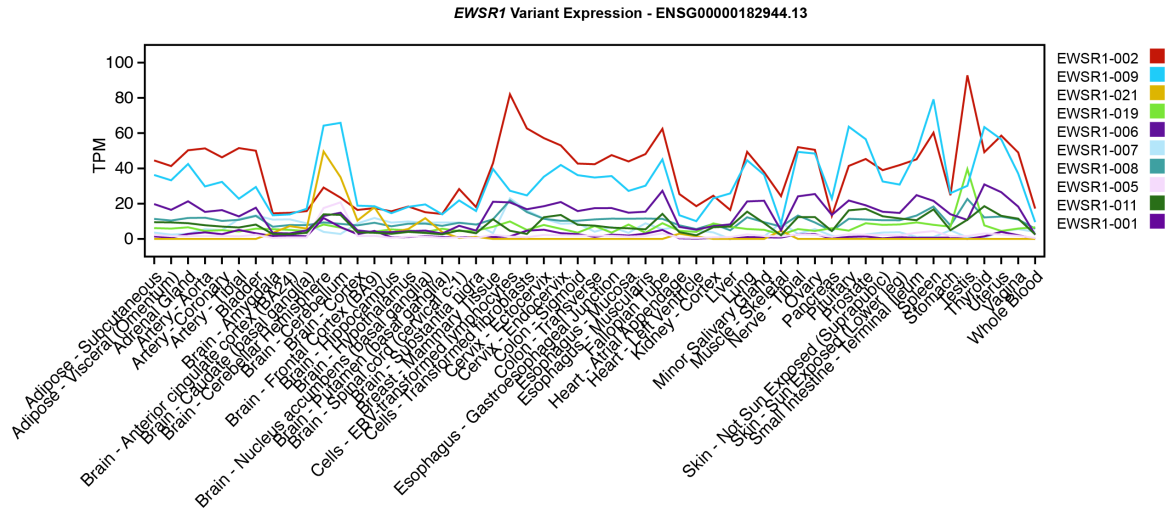

**Figure S2 related to Figure 1. Expression of *EWSR1* transcript variants vary across tissues.** Data obtained from the Genotype-Tissue Expression (GTEx) portal on April 17, 2018.

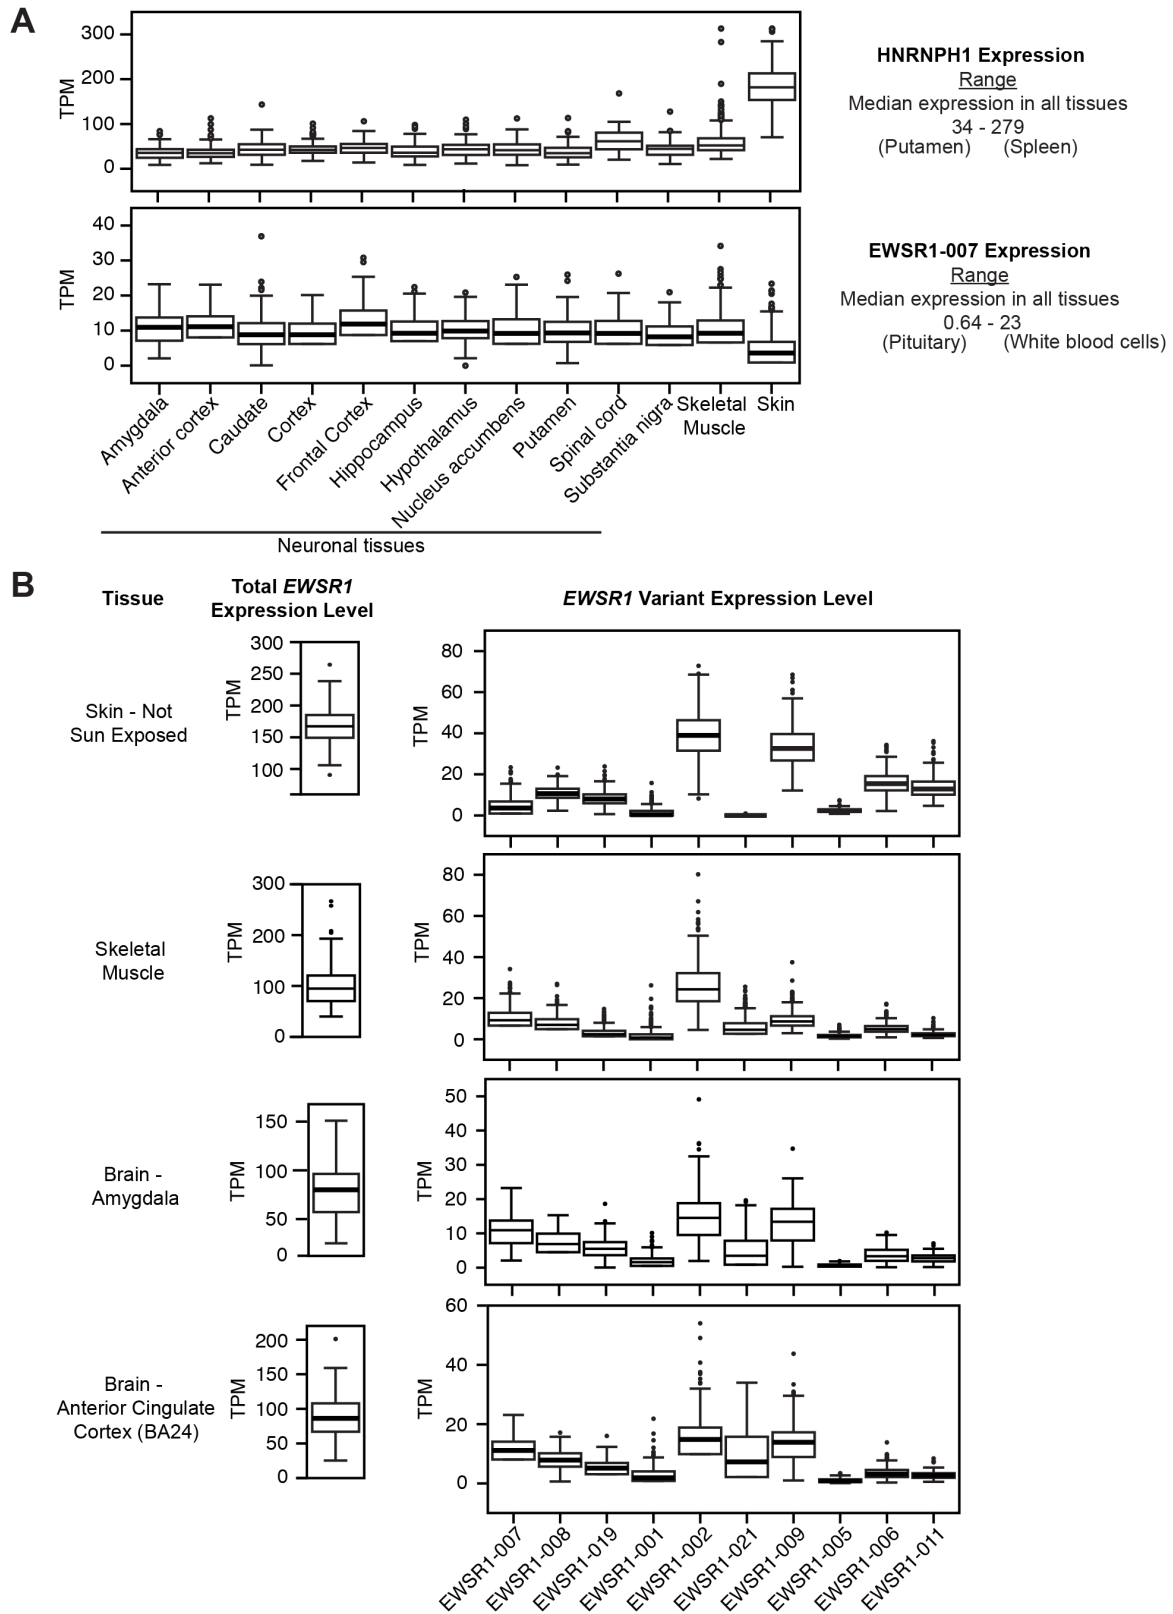

**Figure S3 related to Figure 1. *EWSR1-007* transcript variant is more readily expressed in tissues containing lower *HNRNPH1* expression levels.**

(A) Expression of total *HNRNPH1* (top) and *EWSR1-007* variant (bottom) transcripts in neuronal tissues, skeletal muscle, and skin.

(B) Comparison of total *EWSR1* transcript expression level and its transcript variants in indicated tissues.

Data obtained from the Genotype-Tissue Expression (GTEx) portal on May 5, 2018.

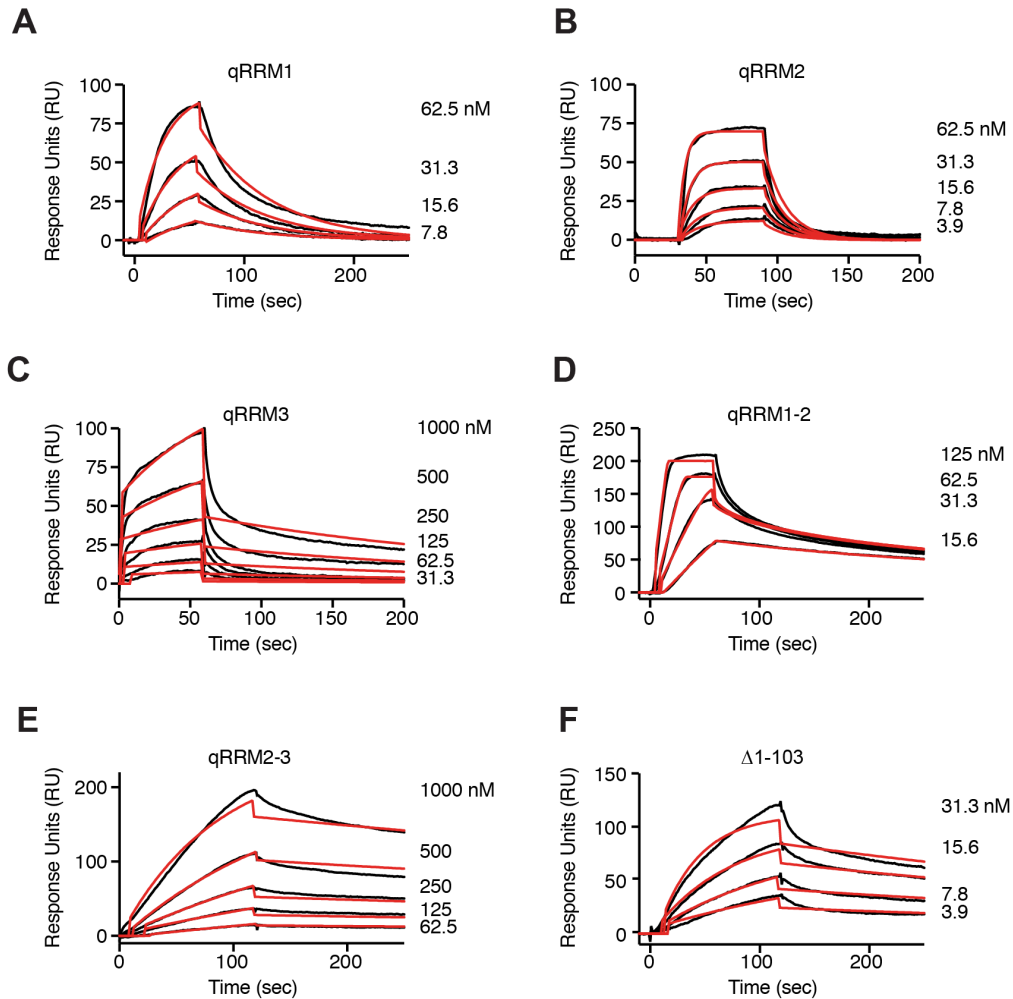

**Figure S4 related to Figure 3. Kinetic analysis of different HNRNPH1 domains and rG1 interactions by SPR.** The binding of different HNRNPH1 domains to a rG1 RNA target surface is shown. Black lines represent the binding responses for each protein at the indicated concentrations on each sensorgram. HNRNPH1 was exposed to the surface for 2 minutes (association phase) followed by 10 minutes flow of running buffer (dissociation phase). Data for qRRM1-2 were fit globally to a 1:1 binding model with mass transfer and all other data were fitted using a 1:1 binding model. The respective fits are shown in red. The resulting parameter values are provided in Table 1.



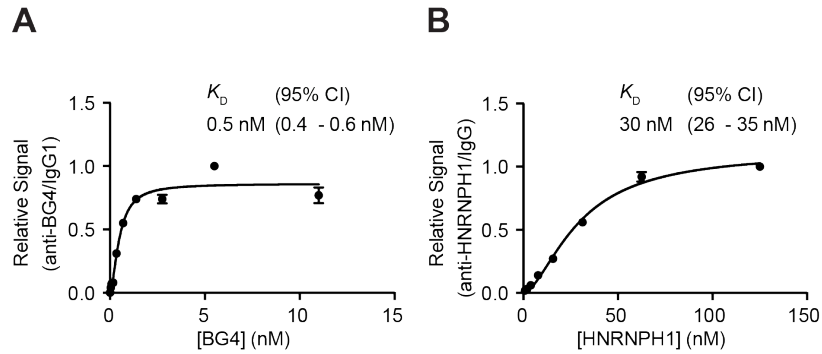

**Figure S5 related to Figure 4. HNRNPH1 directly binds to unstructured G-tracts and RNA G-quadruplex structures within *EWSR1* exon 8 rG1.**

(A) Binding curve for rG1-BG4 immunocomplex determined by the antibody-based RNA binding assay using BG4 antibody. Apparent dissociation constants ( $K_d^{app}$ ) for each immunocomplex are indicated. Data are shown as the mean  $\pm$  SEM of 3 technical replicates.

(B) Binding curve for rG1-HNRNPH1 immunocomplex determined by the antibody-based RNA binding assay using HNRNPH1 antibody. Apparent dissociation constants ( $K_d^{app}$ ) for each immunocomplex are indicated. Data are shown as the mean  $\pm$  SEM of 3 technical replicates.

CI = confidence interval.

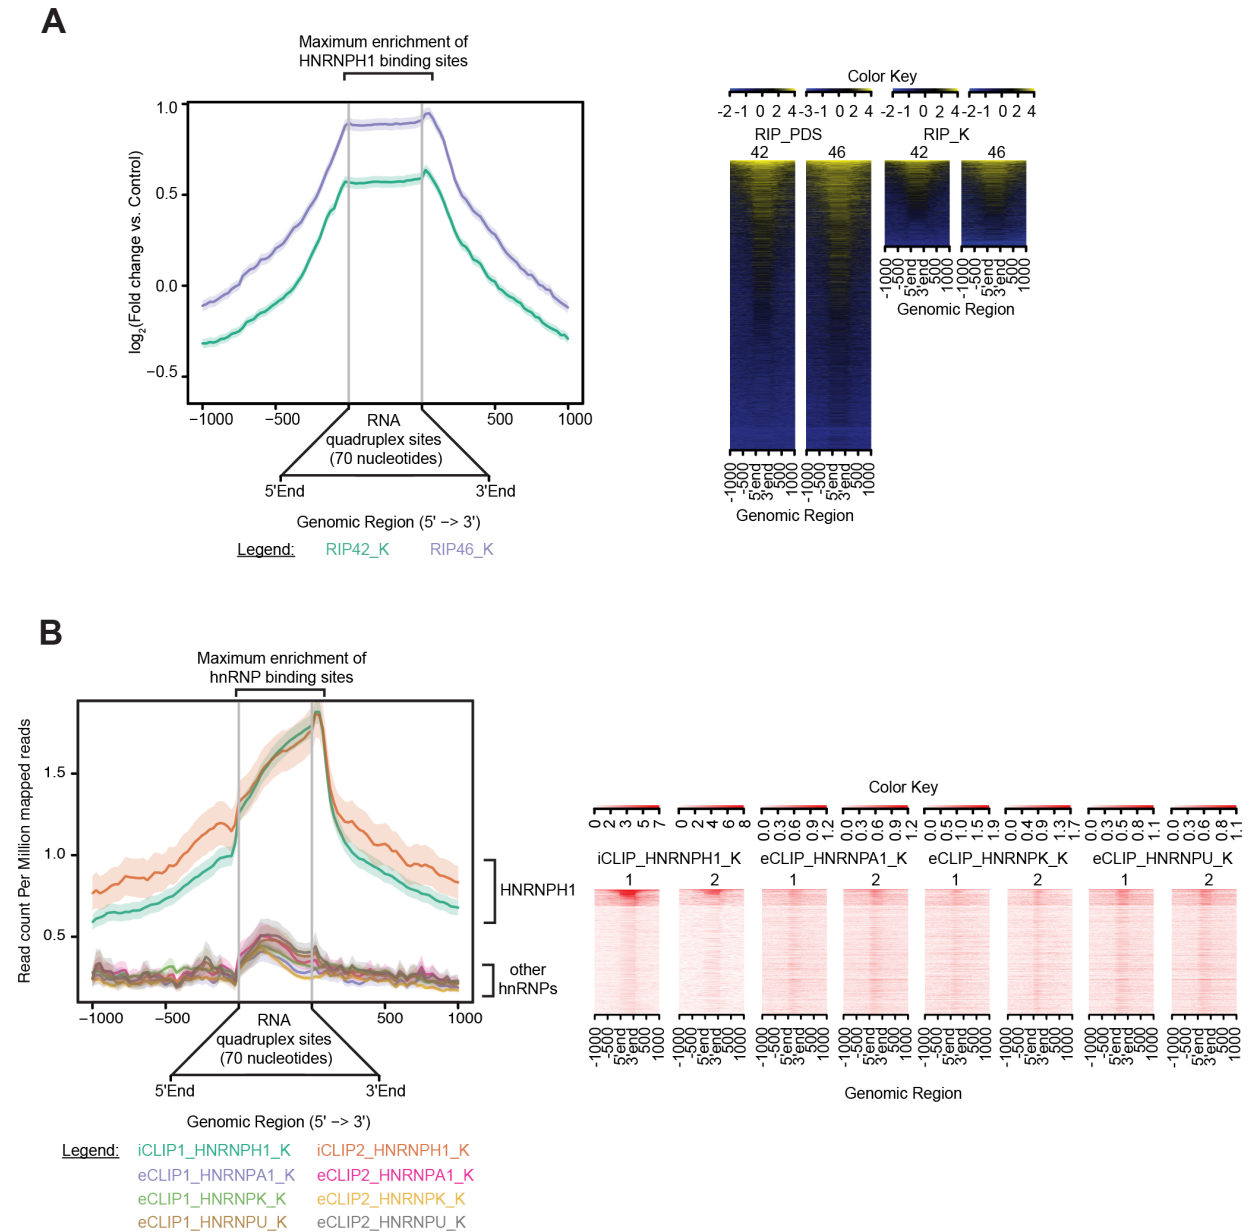

**Figure S6 related to Figure 5. A subgroup of RNA guanine quadruplex regions are enriched near HNRNPH1 binding sites in the human genome.**

(A) Coverage plots (left) and read density heat maps (right) represent binding read count for HNRNPH1 near RNA guanine quadruplex sites ( $\pm 1$  Kb). The RNA targets and binding sites for HNRNPH1 were obtained from RIP seq dataset (Uren et al. 2016). The RNA guanine quadruplex sites were obtained from the sequencing dataset GSE77282 (Kwok et al. 2016).

(B) Coverage plots (left) and read density heat maps (right) represent binding read count for the indicated hnRNPs near RNA guanine quadruplex sites ( $\pm 1$  Kb). The RNA targets and binding sites for each hnRNP were obtained from iCLIP or eCLIP datasets (Uren et al. 2016, Van Nostrand et al. 2016). The RNA guanine quadruplex sites were obtained from the sequencing dataset GSE83617 (Guo and Bartel 2016).

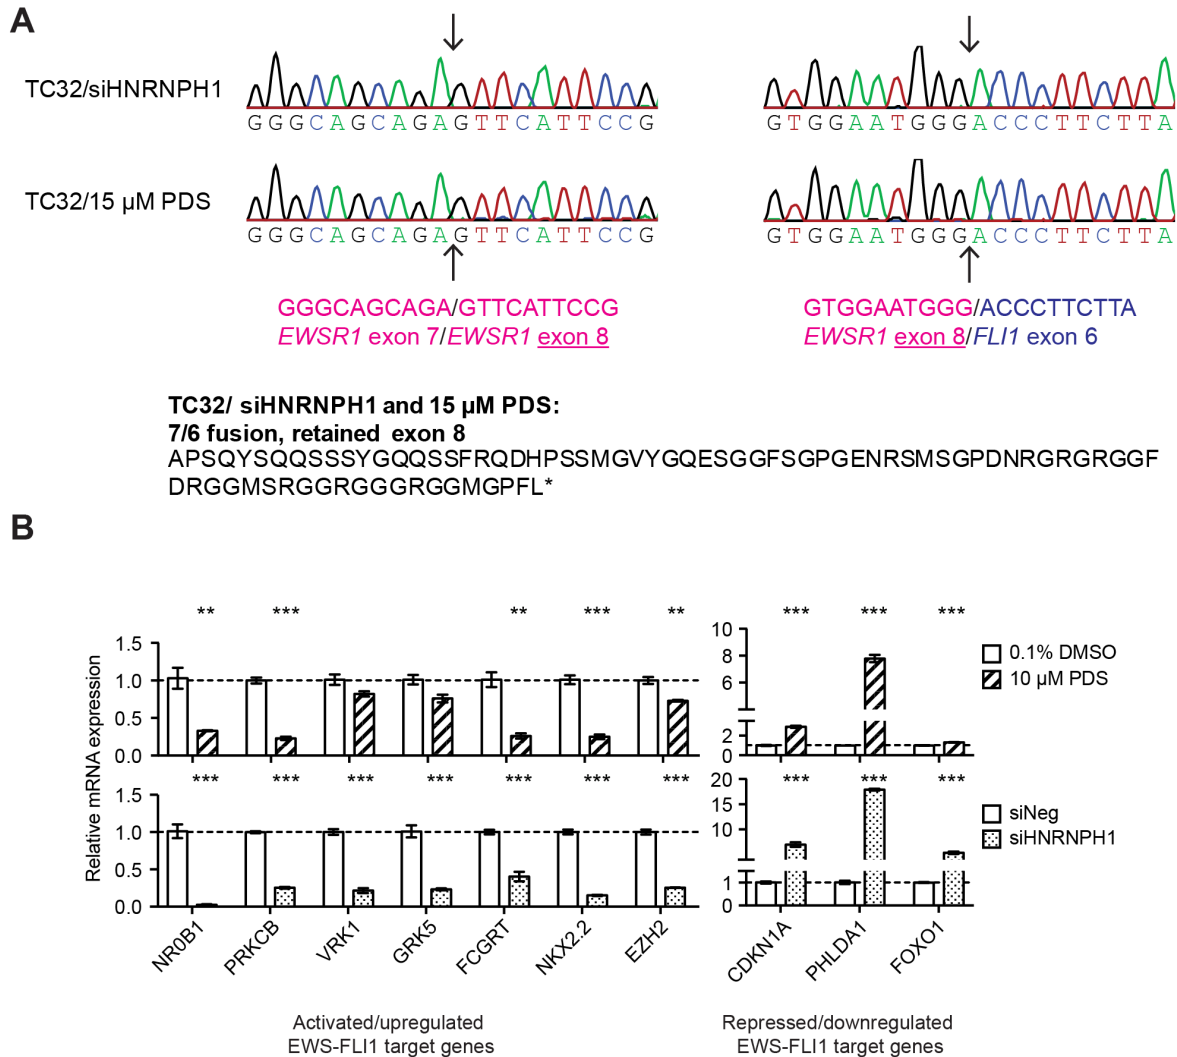

**Figure S7 related to Figure 7. In TC32 cells, PDS modulates *EWS-FLI1* mRNA processing, decreases *EWS-FLI1* protein levels, and restores mRNA expression of *EWS-FLI1* deregulated targets.**

(A) Representative sequence chromatograms show retention of *EWSR1* exon 8 for the additional PCR product amplified from siHNRNPH1-transfected and PDS-treated TC32 cells. The exon junctions are indicated by arrows. The predicted translation of a fusion transcript that retains *EWSR1* exon 8 results in the introduction of a premature stop codon.

(B) qPCR assessment of *EWS-FLI1*-regulated genes in PDS-treated (top) or *HNRNPH1*-silenced (bottom) TC32 EWS cells (48 hours). Data normalized to *ACTB* are expressed relative to control, 0.1% DMSO or siNeg-transfected cells (mean  $\pm$  SEM, n=3). \*\* p<0.01; \*\*\* p<0.001 compared to control. For additional experimental details, refer to **Table S7**.

**SUPPLEMENTAL REFERENCES**

Guo, J.U. and Bartel, D.P. 2016. RNA G-quadruplexes are globally unfolded in eukaryotic cells and depleted in bacteria. *Science* 353: aaf5371.

Kwok, C.K., Marsico, G., Sahakyan, A.B., Chambers, V.S. and Balasubramanian, S. 2016. rG4-seq reveals widespread formation of G-quadruplex structures in the human transcriptome. *Nat Methods* 13: 841-844.

Studier, F.W. 2005. Protein production by auto-induction in high density shaking cultures. *Protein Expr Purif* 41: 207-234.

Uren, P.J., Bahrami-Samani, E., de Araujo, P.R., Vogel, C., Qiao, M., Burns, S.C., Smith, A.D. and Penalva, L.O. 2016. High-throughput analyses of hnRNP H1 dissects its multi-functional aspect. *Rna Biol* 13: 400-411.

Van Nostrand, E.L., Pratt, G.A., Shishkin, A.A., Gelboin-Burkhart, C., Fang, M.Y., Sundararaman, B., Blue, S.M., Nguyen, T.B., Surka, C., Elkins, K. et al. 2016. Robust transcriptome-wide discovery of RNA-binding protein binding sites with enhanced CLIP (eCLIP). *Nat Methods* 13: 508-514.

Zhang, J.P., Li, X.L., Li, G.H., Chen, W., Arakaki, C., Botimer, G.D., Baylink, D., Zhang, L., Wen, W., Fu, Y.W. et al. 2017. Efficient precise knockin with a double cut HDR donor after CRISPR/Cas9-mediated double-stranded DNA cleavage. *Genome Biol* 18: 35.
