# Supplementary material for: HNRNPH1-dependent splicing of a fusion oncogene reveals a targetable RNA G-quadruplex interaction
Source: PubMed Central journal article supplement — RNA. 2019 Dec;25(12):1731–50. doi: 10.1261/rna.072454.119 (PMC6859848; doi:10.1261/rna.072454.119), 2019-12
Supplement: supp_072454.119_Supplemental_Table_S7.pdf [file supp_072454.119_Supplemental_Table_S7.pdf]

Table S7: qPCR additional experimental details

| Related to Figure 1A                                        |                                                                                                                              |                                                    |                                                    |                                                    |
|-------------------------------------------------------------|------------------------------------------------------------------------------------------------------------------------------|----------------------------------------------------|----------------------------------------------------|----------------------------------------------------|
| Item to check                                               | Sample List                                                                                                                  |                                                    |                                                    |                                                    |
|                                                             | TC32 siNegative                                                                                                              | TC32 siHNRNPH1                                     | TC32 siHNRNPH2                                     | TC32 siHNRNPF                                      |
| <b>Experimental design</b>                                  |                                                                                                                              |                                                    |                                                    |                                                    |
| Definition of experimental and control groups               | Control group                                                                                                                | Experimental group                                 | Experimental group                                 | Experimental group                                 |
| Number within each group                                    | n = 3                                                                                                                        | n = 3                                              | n = 3                                              | n = 3                                              |
| <b>Sample</b>                                               |                                                                                                                              |                                                    |                                                    |                                                    |
| Description                                                 | TC32 cells transfected with siNegative for 48 hours                                                                          | TC32 cells transfected with siHNRNPH1 for 48 hours | TC32 cells transfected with siHNRNPH2 for 48 hours | TC32 cells transfected with siHNRNPH2 for 48 hours |
| Processing procedure                                        | Cells were harvested by trypsinization 48 hour after treatment                                                               |                                                    |                                                    |                                                    |
| If frozen, how and how quickly?                             | N/A                                                                                                                          |                                                    |                                                    |                                                    |
| Sample storage conditions and duration                      | Proceeded directly to nucleic acid extraction                                                                                |                                                    |                                                    |                                                    |
| <b>Nucleic acid extraction</b>                              |                                                                                                                              |                                                    |                                                    |                                                    |
| Procedure and/or instrumentation                            | Promega Maxwell 16 LEV System                                                                                                |                                                    |                                                    |                                                    |
| Name of kit and details of any modifications                | Maxwell 16 LEV simplyRNA Purification Kits                                                                                   |                                                    |                                                    |                                                    |
| Details of DNase or RNase treatment                         | Dnase treatment was automated                                                                                                |                                                    |                                                    |                                                    |
| Nucleic acid quantification                                 | Replicate 1: 617.7 ng/uL                                                                                                     | Replicate 1: 308.46 ng/uL                          | Replicate 1: 562.08 ng/uL                          | Replicate 1: 418.5 ng/uL                           |
|                                                             | Replicate 2: 553.21 ng/uL                                                                                                    | Replicate 2: 320.4 ng/uL                           | Replicate 2: 580.93 ng/uL                          | Replicate 2: 612.94 ng/uL                          |
|                                                             | Replicate 3: 658.76 ng/uL                                                                                                    | Replicate 3: 301.57 ng/uL                          | Replicate 3: 534.33 ng/uL                          | Replicate 3: 587.55 ng/uL                          |
| Instrument and method                                       | Nanodrop Nucleic Acid Quantification                                                                                         |                                                    |                                                    |                                                    |
| Purity (A260/A280)                                          | Replicate 1: 2.14                                                                                                            | Replicate 1: 2.15                                  | Replicate 1: 2.13                                  | Replicate 1: 2.14                                  |
|                                                             | Replicate 2: 2.13                                                                                                            | Replicate 2: 2.16                                  | Replicate 2: 2.14                                  | Replicate 2: 2.15                                  |
|                                                             | Replicate 3: 2.16                                                                                                            | Replicate 3: 2.15                                  | Replicate 3: 2.13                                  | Replicate 3: 2.13                                  |
| RNA integrity: method/instrument                            | Nanodrop                                                                                                                     |                                                    |                                                    |                                                    |
| <b>Reverse transcription</b>                                |                                                                                                                              |                                                    |                                                    |                                                    |
| Complete reaction conditions                                | 1X iScript Reverse Transcription Supermix containing oligo(dT) and random primers (Biorad), RNA and water                    |                                                    |                                                    |                                                    |
| Amount of RNA and reaction volume                           | 1000 ng of RNA and 20 uL reaction volume                                                                                     |                                                    |                                                    |                                                    |
| Reverse transcriptase and concentration                     | 1X iScript Reverse Transcriptase                                                                                             |                                                    |                                                    |                                                    |
| Temperature and time                                        | Priming: 5 min at 25C                                                                                                        |                                                    |                                                    |                                                    |
|                                                             | Reverse transcription: 20 min at 46C                                                                                         |                                                    |                                                    |                                                    |
|                                                             | Reverse transcription inactivation: 1 min at 95C                                                                             |                                                    |                                                    |                                                    |
| <b>qPCR target information</b>                              |                                                                                                                              |                                                    |                                                    |                                                    |
| Gene symbol                                                 | refer to Table S3                                                                                                            |                                                    |                                                    |                                                    |
| Sequence accession number                                   |                                                                                                                              |                                                    |                                                    |                                                    |
| Amplicon length                                             |                                                                                                                              |                                                    |                                                    |                                                    |
| In silico specificity screen (BLAST, and so on)             | UCSC In-Silico PCR                                                                                                           |                                                    |                                                    |                                                    |
| What splice variants are targeted?                          | refer to Table S3                                                                                                            |                                                    |                                                    |                                                    |
| <b>qPCR validation</b>                                      |                                                                                                                              |                                                    |                                                    |                                                    |
| Specificity (gel, sequence, melt, or digest)                | Melt                                                                                                                         |                                                    |                                                    |                                                    |
| <b>Data analysis</b>                                        |                                                                                                                              |                                                    |                                                    |                                                    |
| qPCR analysis program (source, version)                     | StepOne Plus Real-time PCR system                                                                                            |                                                    |                                                    |                                                    |
| Method of Cq determination                                  | Applied Biosystems Relative Quantitation Analysis Module                                                                     |                                                    |                                                    |                                                    |
| Outlier identification and disposition                      | OUTLIERG (Outlier in replicate group) quality flag                                                                           |                                                    |                                                    |                                                    |
| Justification of number and choice of reference genes       | Three references genes with minimal standard deviation between replicates and upon treatment were utilized for normalization |                                                    |                                                    |                                                    |
| Description of normalization method                         | Comparative CT ( $\Delta\Delta CT$ ) method                                                                                  |                                                    |                                                    |                                                    |
| Repeatability (intraassay variation)                        | see error bars in Figure 1A                                                                                                  |                                                    |                                                    |                                                    |
| Statistical methods for results significance                | Multiple comparisons using Bonferroni-Dunn method                                                                            |                                                    |                                                    |                                                    |
| Software (source, version)                                  | Applied Biosystems Relative Quantitation Analysis Module and GraphPad Prism 7                                                |                                                    |                                                    |                                                    |
| Item to check                                               | Sample List                                                                                                                  |                                                    |                                                    |                                                    |
|                                                             | TC32 siNegative                                                                                                              | TC32 siHNRNPH1                                     | TC32 siHNRNPH2                                     | TC32 siHNRNPF                                      |
| <b>qPCR oligonucleotides</b>                                |                                                                                                                              |                                                    |                                                    |                                                    |
| Primer sequences                                            | refer to Table S3                                                                                                            |                                                    |                                                    |                                                    |
| <b>qPCR protocol</b>                                        |                                                                                                                              |                                                    |                                                    |                                                    |
| Complete reaction conditions                                | 1X Fast SYBR Green Master Mix (Applied Biosystems), cDNA, and water                                                          |                                                    |                                                    |                                                    |
| Reaction volume and amount of cDNA/DNA                      | 100 ng of cDNA and 20 uL reaction volume                                                                                     |                                                    |                                                    |                                                    |
| Primer, (probe), Mg <sup>2+</sup> , and dNTP concentrations | 250 nM of each primer                                                                                                        |                                                    |                                                    |                                                    |
| Polymerase identity and concentration                       | AmpliTaQ Fast DNA Polymerase                                                                                                 |                                                    |                                                    |                                                    |
| Buffer/kit identity and manufacturer                        | Fast SYBR Green Master Mix (Applied Biosystems)                                                                              |                                                    |                                                    |                                                    |
| Complete thermocycling parameters                           | Step                                                                                                                         | Enzyme Activation                                  | PCR                                                |                                                    |
|                                                             |                                                                                                                              | Hold                                               | Cycles (40 cycles)                                 |                                                    |
|                                                             | Time                                                                                                                         | 20 sec                                             | 3 sec                                              | Anneal/Extend                                      |
|                                                             | Temp (°C)                                                                                                                    | 95                                                 | 95                                                 | 60                                                 |
| Manufacturer of qPCR instrument                             | StepOne Plus Real-time PCR system                                                                                            |                                                    |                                                    |                                                    |

Table S7: qPCR additional experimental details

| Related to Figure 2G                                        |                                                                                                                                       |                                                                                    |                                                                                     |                                                                                    |                                                                                     |                                                                                     |                                                                                    |                                                                                    |                                                                                     |                                                                                   |                                                                                  |                                                                                  |                                                                                  |
|-------------------------------------------------------------|---------------------------------------------------------------------------------------------------------------------------------------|------------------------------------------------------------------------------------|-------------------------------------------------------------------------------------|------------------------------------------------------------------------------------|-------------------------------------------------------------------------------------|-------------------------------------------------------------------------------------|------------------------------------------------------------------------------------|------------------------------------------------------------------------------------|-------------------------------------------------------------------------------------|-----------------------------------------------------------------------------------|----------------------------------------------------------------------------------|----------------------------------------------------------------------------------|----------------------------------------------------------------------------------|
| Item to check                                               | Sample List                                                                                                                           | TC32 Untreated                                                                     | TC32 siNegative                                                                     | TC32 siHNRNPH1                                                                     | TC32 siFL11                                                                         | TC32 20 nM rG1 oligomer                                                             | TC32 40 nM rG1 oligomer                                                            | TC32 80 nM rG1 oligomer                                                            | TC32 160 nM rG1 oligomer                                                            | TC32 20 nM rG1 mutant 1 oligomer                                                  | TC32 40 nM rG1 mutant 1 oligomer                                                 | TC32 80 nM rG1 mutant 1 oligomer                                                 | TC32 160 nM rG1 mutant 1 oligomer                                                |
| <b>Experimental design</b>                                  |                                                                                                                                       |                                                                                    |                                                                                     |                                                                                    |                                                                                     |                                                                                     |                                                                                    |                                                                                    |                                                                                     |                                                                                   |                                                                                  |                                                                                  |                                                                                  |
| Definition of experimental and control groups               | Control group                                                                                                                         | Control group                                                                      | Experimental group                                                                  | Experimental group                                                                 | Experimental group                                                                  | Experimental group                                                                  | Experimental group                                                                 | Experimental group                                                                 | Experimental group                                                                  | Experimental group                                                                | Experimental group                                                               | Experimental group                                                               | Experimental group                                                               |
| Number within each group                                    | n = 3                                                                                                                                 | n = 3                                                                              | n = 3                                                                               | n = 3                                                                              | n = 3                                                                               | n = 3                                                                               | n = 3                                                                              | n = 3                                                                              | n = 3                                                                               | n = 3                                                                             | n = 3                                                                            | n = 3                                                                            | n = 3                                                                            |
| <b>Sample</b>                                               |                                                                                                                                       |                                                                                    |                                                                                     |                                                                                    |                                                                                     |                                                                                     |                                                                                    |                                                                                    |                                                                                     |                                                                                   |                                                                                  |                                                                                  |                                                                                  |
| Description                                                 | untreated TC32 cells for 48 hours                                                                                                     | TC32 cells transfected with siNegative for 48 hours                                | TC32 cells transfected with siHNRNPH1 for 48 hours                                  | TC32 cells transfected with siFL11 for 48 hours                                    | TC32 cells transfected with 20 nM rG1 oligomer for 48 hours                         | TC32 cells transfected with 40 nM rG1 oligomer for 48 hours                         | TC32 cells transfected with 80 nM rG1 oligomer for 48 hours                        | TC32 cells transfected with 160 nM rG1 oligomer for 48 hours                       | TC32 cells transfected with 20 nM rG1 mutant 1 oligomer for 48 hours                | TC32 cells transfected with 40 nM rG1 mutant 1 oligomer for 48 hours              | TC32 cells transfected with 80 nM rG1 mutant 1 oligomer for 48 hours             | TC32 cells transfected with 160 nM rG1 mutant 1 oligomer for 48 hours            | TC32 cells transfected with 160 nM rG1 mutant 1 oligomer for 48 hours            |
| Processing procedure                                        | Cells were harvested by trypsinization 48 hour after treatment                                                                        |                                                                                    |                                                                                     |                                                                                    |                                                                                     |                                                                                     |                                                                                    |                                                                                    |                                                                                     |                                                                                   |                                                                                  |                                                                                  |                                                                                  |
| If frozen, how and how quickly?                             | Flash Frozen                                                                                                                          |                                                                                    |                                                                                     |                                                                                    |                                                                                     |                                                                                     |                                                                                    |                                                                                    |                                                                                     |                                                                                   |                                                                                  |                                                                                  |                                                                                  |
| Sample storage conditions and duration                      | Stored in -80C for 9 days                                                                                                             |                                                                                    |                                                                                     |                                                                                    |                                                                                     |                                                                                     |                                                                                    |                                                                                    |                                                                                     |                                                                                   |                                                                                  |                                                                                  |                                                                                  |
| <b>Nucleic acid extraction</b>                              |                                                                                                                                       |                                                                                    |                                                                                     |                                                                                    |                                                                                     |                                                                                     |                                                                                    |                                                                                    |                                                                                     |                                                                                   |                                                                                  |                                                                                  |                                                                                  |
| Procedure and/or instrumentation                            | Promega Maxwell 16 LEV System                                                                                                         |                                                                                    |                                                                                     |                                                                                    |                                                                                     |                                                                                     |                                                                                    |                                                                                    |                                                                                     |                                                                                   |                                                                                  |                                                                                  |                                                                                  |
| Name of kit and details of any modifications                | Maxwell 16 LEV simplyRNA Purification Kits                                                                                            |                                                                                    |                                                                                     |                                                                                    |                                                                                     |                                                                                     |                                                                                    |                                                                                    |                                                                                     |                                                                                   |                                                                                  |                                                                                  |                                                                                  |
| Details of DNase or RNase treatment                         | DNase treatment was automated                                                                                                         |                                                                                    |                                                                                     |                                                                                    |                                                                                     |                                                                                     |                                                                                    |                                                                                    |                                                                                     |                                                                                   |                                                                                  |                                                                                  |                                                                                  |
| Nucleic acid quantification                                 | Replicate 1: 556.25 ng/ul<br>Replicate 2: 234.58 ng/ul<br>Replicate 3: 540.24 ng/ul                                                   | Replicate 1: 329.66 ng/ul<br>Replicate 2: 397.08 ng/ul<br>Replicate 3: 411.7 ng/ul | Replicate 1: 126.34 ng/ul<br>Replicate 2: 138.92 ng/ul<br>Replicate 3: 142.52 ng/ul | Replicate 1: 109.03 ng/ul<br>Replicate 2: 110.82 ng/ul<br>Replicate 3: 128.3 ng/ul | Replicate 1: 256.19 ng/ul<br>Replicate 2: 284.12 ng/ul<br>Replicate 3: 298.16 ng/ul | Replicate 1: 103.59 ng/ul<br>Replicate 2: 102.58 ng/ul<br>Replicate 3: 117.69 ng/ul | Replicate 1: 90.78 ng/ul<br>Replicate 2: 103.23 ng/ul<br>Replicate 3: 116.62 ng/ul | Replicate 1: 87.81 ng/ul<br>Replicate 2: 129.63 ng/ul<br>Replicate 3: 124.94 ng/ul | Replicate 1: 394.04 ng/ul<br>Replicate 2: 253.56 ng/ul<br>Replicate 3: 408.98 ng/ul | Replicate 1: 394.9 ng/ul<br>Replicate 2: 375.7 ng/ul<br>Replicate 3: 215.39 ng/ul | Replicate 1: 429.93 ng/ul<br>Replicate 2: 388.36 ng/ul<br>Replicate 3: 347 ng/ul | Replicate 1: 445.21 ng/ul<br>Replicate 2: 400.66 ng/ul<br>Replicate 3: 334 ng/ul | Replicate 1: 445.21 ng/ul<br>Replicate 2: 400.66 ng/ul<br>Replicate 3: 334 ng/ul |
| Instrument and method                                       | Nanodrop Nucleic Acid Quantification                                                                                                  |                                                                                    |                                                                                     |                                                                                    |                                                                                     |                                                                                     |                                                                                    |                                                                                    |                                                                                     |                                                                                   |                                                                                  |                                                                                  |                                                                                  |
| Purity (A260/A280)                                          | Replicate 1: 2.18<br>Replicate 2: 2.14<br>Replicate 3: 2.23                                                                           | Replicate 1: 2.13<br>Replicate 2: 2.11<br>Replicate 3: 2.12                        | Replicate 1: 2.1<br>Replicate 2: 2.12<br>Replicate 3: 2.08                          | Replicate 1: 2.1<br>Replicate 2: 2.08<br>Replicate 3: 2.08                         | Replicate 1: 2.13<br>Replicate 2: 2.12<br>Replicate 3: 2.14                         | Replicate 1: 2.07<br>Replicate 2: 2.12<br>Replicate 3: 2.1                          | Replicate 1: 2.09<br>Replicate 2: 2.04<br>Replicate 3: 2.11                        | Replicate 1: 2.07<br>Replicate 2: 2.08<br>Replicate 3: 2.09                        | Replicate 1: 2.14<br>Replicate 2: 2.12<br>Replicate 3: 2.12                         | Replicate 1: 2.12<br>Replicate 2: 2.13<br>Replicate 3: 2.1                        | Replicate 1: 2.13<br>Replicate 2: 2.12<br>Replicate 3: 2.12                      | Replicate 1: 2.13<br>Replicate 2: 2.12<br>Replicate 3: 2.12                      | Replicate 1: 2.12<br>Replicate 2: 2.12<br>Replicate 3: 2.13                      |
| RNA integrity: method/instrument                            | Nanodrop                                                                                                                              |                                                                                    |                                                                                     |                                                                                    |                                                                                     |                                                                                     |                                                                                    |                                                                                    |                                                                                     |                                                                                   |                                                                                  |                                                                                  |                                                                                  |
| <b>Reverse transcription</b>                                |                                                                                                                                       |                                                                                    |                                                                                     |                                                                                    |                                                                                     |                                                                                     |                                                                                    |                                                                                    |                                                                                     |                                                                                   |                                                                                  |                                                                                  |                                                                                  |
| Complete reaction conditions                                | 1X iScript Reverse Transcription Supermix containing oligo(dT) and random primers (Biorad), RNA and water                             |                                                                                    |                                                                                     |                                                                                    |                                                                                     |                                                                                     |                                                                                    |                                                                                    |                                                                                     |                                                                                   |                                                                                  |                                                                                  |                                                                                  |
| Amount of RNA and reaction volume                           | 1000 ng of RNA and 20 ul reaction volume                                                                                              |                                                                                    |                                                                                     |                                                                                    |                                                                                     |                                                                                     |                                                                                    |                                                                                    |                                                                                     |                                                                                   |                                                                                  |                                                                                  |                                                                                  |
| Reverse transcriptase and concentration                     | 1X iScript Reverse Transcriptase                                                                                                      |                                                                                    |                                                                                     |                                                                                    |                                                                                     |                                                                                     |                                                                                    |                                                                                    |                                                                                     |                                                                                   |                                                                                  |                                                                                  |                                                                                  |
| Temperature and time                                        | Priming: 5 min at 25C<br>Reverse transcription: 20 min at 46C<br>Reverse transcription inactivation: 1 min at 95C                     |                                                                                    |                                                                                     |                                                                                    |                                                                                     |                                                                                     |                                                                                    |                                                                                    |                                                                                     |                                                                                   |                                                                                  |                                                                                  |                                                                                  |
| <b>qPCR target information</b>                              |                                                                                                                                       |                                                                                    |                                                                                     |                                                                                    |                                                                                     |                                                                                     |                                                                                    |                                                                                    |                                                                                     |                                                                                   |                                                                                  |                                                                                  |                                                                                  |
| Gene symbol                                                 | refer to Table S3                                                                                                                     |                                                                                    |                                                                                     |                                                                                    |                                                                                     |                                                                                     |                                                                                    |                                                                                    |                                                                                     |                                                                                   |                                                                                  |                                                                                  |                                                                                  |
| Sequence accession number                                   |                                                                                                                                       |                                                                                    |                                                                                     |                                                                                    |                                                                                     |                                                                                     |                                                                                    |                                                                                    |                                                                                     |                                                                                   |                                                                                  |                                                                                  |                                                                                  |
| Amplicon length                                             |                                                                                                                                       |                                                                                    |                                                                                     |                                                                                    |                                                                                     |                                                                                     |                                                                                    |                                                                                    |                                                                                     |                                                                                   |                                                                                  |                                                                                  |                                                                                  |
| In silico specificity screen (BLAST, and so on)             | UCSC In-Silico PCR                                                                                                                    |                                                                                    |                                                                                     |                                                                                    |                                                                                     |                                                                                     |                                                                                    |                                                                                    |                                                                                     |                                                                                   |                                                                                  |                                                                                  |                                                                                  |
| What splice variants are targeted?                          | refer to Table S3                                                                                                                     |                                                                                    |                                                                                     |                                                                                    |                                                                                     |                                                                                     |                                                                                    |                                                                                    |                                                                                     |                                                                                   |                                                                                  |                                                                                  |                                                                                  |
| Item to check                                               | Sample List                                                                                                                           | TC32 Untreated                                                                     | TC32 siNegative                                                                     | TC32 siHNRNPH1                                                                     | TC32 siFL11                                                                         | TC32 20 nM rG1 oligomer                                                             | TC32 40 nM rG1 oligomer                                                            | TC32 80 nM rG1 oligomer                                                            | TC32 160 nM rG1 oligomer                                                            | TC32 20 nM rG1 mutant 1 oligomer                                                  | TC32 40 nM rG1 mutant 1 oligomer                                                 | TC32 80 nM rG1 mutant 1 oligomer                                                 | TC32 160 nM rG1 mutant 1 oligomer                                                |
| <b>qPCR oligonucleotides</b>                                |                                                                                                                                       |                                                                                    |                                                                                     |                                                                                    |                                                                                     |                                                                                     |                                                                                    |                                                                                    |                                                                                     |                                                                                   |                                                                                  |                                                                                  |                                                                                  |
| Primer sequences                                            | refer to Table S3                                                                                                                     |                                                                                    |                                                                                     |                                                                                    |                                                                                     |                                                                                     |                                                                                    |                                                                                    |                                                                                     |                                                                                   |                                                                                  |                                                                                  |                                                                                  |
| <b>qPCR protocol</b>                                        |                                                                                                                                       |                                                                                    |                                                                                     |                                                                                    |                                                                                     |                                                                                     |                                                                                    |                                                                                    |                                                                                     |                                                                                   |                                                                                  |                                                                                  |                                                                                  |
| Complete reaction conditions                                | 1X Fast SYBR Green Master Mix (Applied Biosystems), cDNA, and water                                                                   |                                                                                    |                                                                                     |                                                                                    |                                                                                     |                                                                                     |                                                                                    |                                                                                    |                                                                                     |                                                                                   |                                                                                  |                                                                                  |                                                                                  |
| Reaction volume and amount of cDNA/DNA                      | 100 ng of cDNA and 20 ul reaction volume                                                                                              |                                                                                    |                                                                                     |                                                                                    |                                                                                     |                                                                                     |                                                                                    |                                                                                    |                                                                                     |                                                                                   |                                                                                  |                                                                                  |                                                                                  |
| Primer, (probe), Mg <sup>2+</sup> , and dNTP concentrations | 250 nM of each primer                                                                                                                 |                                                                                    |                                                                                     |                                                                                    |                                                                                     |                                                                                     |                                                                                    |                                                                                    |                                                                                     |                                                                                   |                                                                                  |                                                                                  |                                                                                  |
| Polymerase identity and concentration                       | AmpliTaq Fast DNA Polymerase                                                                                                          |                                                                                    |                                                                                     |                                                                                    |                                                                                     |                                                                                     |                                                                                    |                                                                                    |                                                                                     |                                                                                   |                                                                                  |                                                                                  |                                                                                  |
| Buffer/kit identity and manufacturer                        | Fast SYBR Green Master Mix (Applied Biosystems)                                                                                       |                                                                                    |                                                                                     |                                                                                    |                                                                                     |                                                                                     |                                                                                    |                                                                                    |                                                                                     |                                                                                   |                                                                                  |                                                                                  |                                                                                  |
| Complete thermocycling parameters (all ssamples)            | Step                                                                                                                                  | Enzyme Activation                                                                  |                                                                                     | PCR                                                                                |                                                                                     |                                                                                     |                                                                                    |                                                                                    |                                                                                     |                                                                                   |                                                                                  |                                                                                  |                                                                                  |
|                                                             |                                                                                                                                       | Hold                                                                               |                                                                                     | Cycles (40 cycles)                                                                 |                                                                                     |                                                                                     |                                                                                    |                                                                                    |                                                                                     |                                                                                   |                                                                                  |                                                                                  |                                                                                  |
|                                                             |                                                                                                                                       |                                                                                    |                                                                                     | Denature                                                                           | Anneal/Extend                                                                       |                                                                                     |                                                                                    |                                                                                    |                                                                                     |                                                                                   |                                                                                  |                                                                                  |                                                                                  |
|                                                             | Time                                                                                                                                  | 20 sec                                                                             |                                                                                     | 3 sec                                                                              | 30 sec                                                                              |                                                                                     |                                                                                    |                                                                                    |                                                                                     |                                                                                   |                                                                                  |                                                                                  |                                                                                  |
|                                                             | Temp (°C)                                                                                                                             | 95                                                                                 |                                                                                     | 95                                                                                 | 60                                                                                  |                                                                                     |                                                                                    |                                                                                    |                                                                                     |                                                                                   |                                                                                  |                                                                                  |                                                                                  |
| Manufacturer of qPCR instrument                             |                                                                                                                                       |                                                                                    |                                                                                     |                                                                                    |                                                                                     |                                                                                     |                                                                                    |                                                                                    |                                                                                     |                                                                                   |                                                                                  |                                                                                  |                                                                                  |
| <b>qPCR validation</b>                                      |                                                                                                                                       |                                                                                    |                                                                                     |                                                                                    |                                                                                     |                                                                                     |                                                                                    |                                                                                    |                                                                                     |                                                                                   |                                                                                  |                                                                                  |                                                                                  |
| Specificity (gel, sequence, melt, or digest)                | Melt                                                                                                                                  |                                                                                    |                                                                                     |                                                                                    |                                                                                     |                                                                                     |                                                                                    |                                                                                    |                                                                                     |                                                                                   |                                                                                  |                                                                                  |                                                                                  |
| <b>Data analysis</b>                                        |                                                                                                                                       |                                                                                    |                                                                                     |                                                                                    |                                                                                     |                                                                                     |                                                                                    |                                                                                    |                                                                                     |                                                                                   |                                                                                  |                                                                                  |                                                                                  |
| qPCR analysis program (source, version)                     | StepOne Plus Real-time PCR system                                                                                                     |                                                                                    |                                                                                     |                                                                                    |                                                                                     |                                                                                     |                                                                                    |                                                                                    |                                                                                     |                                                                                   |                                                                                  |                                                                                  |                                                                                  |
| Method of Cq determination                                  | Applied Biosystems Relative Quantitation Analysis Module                                                                              |                                                                                    |                                                                                     |                                                                                    |                                                                                     |                                                                                     |                                                                                    |                                                                                    |                                                                                     |                                                                                   |                                                                                  |                                                                                  |                                                                                  |
| Outlier identification and disposition                      | OUTLIERRG (Outlier in replicate group) quality flag                                                                                   |                                                                                    |                                                                                     |                                                                                    |                                                                                     |                                                                                     |                                                                                    |                                                                                    |                                                                                     |                                                                                   |                                                                                  |                                                                                  |                                                                                  |
| Justification of number and choice of reference gene        | One reference gene with minimal standard deviation between replicates and upon treatment were utilized for normalization              |                                                                                    |                                                                                     |                                                                                    |                                                                                     |                                                                                     |                                                                                    |                                                                                    |                                                                                     |                                                                                   |                                                                                  |                                                                                  |                                                                                  |
| Description of normalization method                         | Comparative CT ( $\Delta\Delta CT$ ) method                                                                                           |                                                                                    |                                                                                     |                                                                                    |                                                                                     |                                                                                     |                                                                                    |                                                                                    |                                                                                     |                                                                                   |                                                                                  |                                                                                  |                                                                                  |
| Repeatability (intraassay variation)                        | see error bars in Figure 2G                                                                                                           |                                                                                    |                                                                                     |                                                                                    |                                                                                     |                                                                                     |                                                                                    |                                                                                    |                                                                                     |                                                                                   |                                                                                  |                                                                                  |                                                                                  |
| Statistical methods for results significance                | Multiple comparisons by controlling the False Discovery Rate - Two-stage linear set-up procedure of Benjamini, Krieger, and Yekutieli |                                                                                    |                                                                                     |                                                                                    |                                                                                     |                                                                                     |                                                                                    |                                                                                    |                                                                                     |                                                                                   |                                                                                  |                                                                                  |                                                                                  |
| Software (source, version)                                  | Applied Biosystems Relative Quantitation Analysis Module and GraphPad Prism 7                                                         |                                                                                    |                                                                                     |                                                                                    |                                                                                     |                                                                                     |                                                                                    |                                                                                    |                                                                                     |                                                                                   |                                                                                  |                                                                                  |                                                                                  |

Table S7: qPCR additional experimental details

| Related to Figure 7A                                        |                                                                                                                                              |                                                                                     |                                                                                  |                                                                                     |                                                                                     |                                                                                     |                                                                                     |                                                                                    |
|-------------------------------------------------------------|----------------------------------------------------------------------------------------------------------------------------------------------|-------------------------------------------------------------------------------------|----------------------------------------------------------------------------------|-------------------------------------------------------------------------------------|-------------------------------------------------------------------------------------|-------------------------------------------------------------------------------------|-------------------------------------------------------------------------------------|------------------------------------------------------------------------------------|
| Item to check                                               | Sample List                                                                                                                                  |                                                                                     |                                                                                  |                                                                                     |                                                                                     |                                                                                     |                                                                                     |                                                                                    |
|                                                             | TC32 Untreated                                                                                                                               | TC32 siNegative                                                                     | TC32 siHNRNP1                                                                    | TC32 siFLU1                                                                         | TC32 DMSO                                                                           | TC32 5uM PDS                                                                        | TC32 10uM PDS                                                                       | TC32 15uM PDS                                                                      |
| <b>Experimental design</b>                                  |                                                                                                                                              |                                                                                     |                                                                                  |                                                                                     |                                                                                     |                                                                                     |                                                                                     |                                                                                    |
| Definition of experimental and control groups               | Control group                                                                                                                                | Control group                                                                       | Experimental group                                                               | Experimental group                                                                  | Control group                                                                       | Experimental group                                                                  | Experimental group                                                                  | Experimental group                                                                 |
| Number within each group                                    | n=3                                                                                                                                          | n = 3                                                                               | n = 3                                                                            | n = 3                                                                               | n = 3                                                                               | n = 3                                                                               | n = 3                                                                               | n = 3                                                                              |
| <b>Sample</b>                                               |                                                                                                                                              |                                                                                     |                                                                                  |                                                                                     |                                                                                     |                                                                                     |                                                                                     |                                                                                    |
| Description                                                 | untreated TC32 cells for 48 hours                                                                                                            | TC32 cells transfected with siNegative for 48 hours                                 | TC32 cells transfected with siHNRNP1 for 48 hours                                | TC32 cells transfected with siFLU1 for 48 hours                                     | TC32 cells treated with DMSO for 48 hours                                           | TC32 cells treated with 5micromolar of pyridostatin for 48 hours                    | TC32 cells treated with 10 micromolar of pyridostatin for 48 hours                  | TC32 cells treated with 15 micromolar of pyridostatin for 48 hours                 |
| Processing procedure                                        | Cells were harvested by trypsinization 48 hour after treatment                                                                               |                                                                                     |                                                                                  |                                                                                     |                                                                                     |                                                                                     |                                                                                     |                                                                                    |
| If frozen, how and how quickly?                             | Flash Frozen                                                                                                                                 |                                                                                     |                                                                                  |                                                                                     |                                                                                     |                                                                                     |                                                                                     |                                                                                    |
| Sample storage conditions and duration                      | Stored in -80C for 6 days                                                                                                                    |                                                                                     |                                                                                  |                                                                                     |                                                                                     |                                                                                     |                                                                                     |                                                                                    |
| <b>Nucleic acid extraction</b>                              |                                                                                                                                              |                                                                                     |                                                                                  |                                                                                     |                                                                                     |                                                                                     |                                                                                     |                                                                                    |
| Procedure and/or instrumentation                            | Promega Maxwell 16 LEV System                                                                                                                |                                                                                     |                                                                                  |                                                                                     |                                                                                     |                                                                                     |                                                                                     |                                                                                    |
| Name of kit and details of any modifications                | Maxwell 16 LEV simplyRNA Purification Kits                                                                                                   |                                                                                     |                                                                                  |                                                                                     |                                                                                     |                                                                                     |                                                                                     |                                                                                    |
| Details of DNase or RNase treatment                         | DNase treatment was automated                                                                                                                |                                                                                     |                                                                                  |                                                                                     |                                                                                     |                                                                                     |                                                                                     |                                                                                    |
| Nucleic acid quantification                                 | Replicate 1: 761.98 ng/ul<br>Replicate 2: 733.85 ng/ul<br>Replicate 3: 697.34 ng/ul                                                          | Replicate 1: 682.26 ng/ul<br>Replicate 2: 654.15 ng/ul<br>Replicate 3: 714.49 ng/ul | Replicate 1: 163 ng/ul<br>Replicate 2: 167.39 ng/ul<br>Replicate 3: 168.44 ng/ul | Replicate 1: 149.95 ng/ul<br>Replicate 2: 124.67 ng/ul<br>Replicate 3: 125.16 ng/ul | Replicate 1: 731.69 ng/ul<br>Replicate 2: 720.51 ng/ul<br>Replicate 3: 726.33 ng/ul | Replicate 1: 336.24 ng/ul<br>Replicate 2: 557.52 ng/ul<br>Replicate 3: 568.08 ng/ul | Replicate 1: 201.47 ng/ul<br>Replicate 2: 220.72 ng/ul<br>Replicate 3: 246.76 ng/ul | Replicate 1: 149.76 ng/ul<br>Replicate 2: 138.69 ng/ul<br>Replicate 3: 147.9 ng/ul |
| Instrument and method                                       | Nanodrop Nucleic Acid Quantification                                                                                                         |                                                                                     |                                                                                  |                                                                                     |                                                                                     |                                                                                     |                                                                                     |                                                                                    |
| Purity (A260/A280)                                          | Replicate 1: 2.16<br>Replicate 2: 2.19<br>Replicate 3: 2.19                                                                                  | Replicate 1: 2.15<br>Replicate 2: 2.16<br>Replicate 3: 2.17                         | Replicate 1: 2.17<br>Replicate 2: 2.18<br>Replicate 3: 2.14                      | Replicate 1: 2.13<br>Replicate 2: 2.17<br>Replicate 3: 2.18                         | Replicate 1: 2.16<br>Replicate 2: 2.17<br>Replicate 3: 2.16                         | Replicate 1: 2.16<br>Replicate 2: 2.17<br>Replicate 3: 2.16                         | Replicate 1: 2.18<br>Replicate 2: 2.15<br>Replicate 3: 2.15                         | Replicate 1: 2.12<br>Replicate 2: 2.16<br>Replicate 3: 2.15                        |
| RNA integrity: method/instrument                            | Nanodrop                                                                                                                                     |                                                                                     |                                                                                  |                                                                                     |                                                                                     |                                                                                     |                                                                                     |                                                                                    |
| <b>Reverse transcription</b>                                |                                                                                                                                              |                                                                                     |                                                                                  |                                                                                     |                                                                                     |                                                                                     |                                                                                     |                                                                                    |
| Complete reaction conditions                                | 1000 ng of RNA and 20 uL reaction volume                                                                                                     |                                                                                     |                                                                                  |                                                                                     |                                                                                     |                                                                                     |                                                                                     |                                                                                    |
| Amount of RNA and reaction volume                           | 1X Iscript Reverse Transcriptase                                                                                                             |                                                                                     |                                                                                  |                                                                                     |                                                                                     |                                                                                     |                                                                                     |                                                                                    |
| Reverse transcriptase and concentration                     | Priming: 5 min at 25C                                                                                                                        |                                                                                     |                                                                                  |                                                                                     |                                                                                     |                                                                                     |                                                                                     |                                                                                    |
| Temperature and time                                        | Reverse transcription: 20 min at 46C<br>Reverse transcription inactivation: 1 min at 95C<br>Reverse transcription inactivation: 1 min at 95C |                                                                                     |                                                                                  |                                                                                     |                                                                                     |                                                                                     |                                                                                     |                                                                                    |
| <b>qPCR target information</b>                              |                                                                                                                                              |                                                                                     |                                                                                  |                                                                                     |                                                                                     |                                                                                     |                                                                                     |                                                                                    |
| Gene symbol                                                 | refer to Table S3                                                                                                                            |                                                                                     |                                                                                  |                                                                                     |                                                                                     |                                                                                     |                                                                                     |                                                                                    |
| Sequence accession number                                   | refer to Table S3                                                                                                                            |                                                                                     |                                                                                  |                                                                                     |                                                                                     |                                                                                     |                                                                                     |                                                                                    |
| Amplicon length                                             | refer to Table S3                                                                                                                            |                                                                                     |                                                                                  |                                                                                     |                                                                                     |                                                                                     |                                                                                     |                                                                                    |
| In silico specificity screen (BLAST, and so on)             | UCSC In-Silico PCR                                                                                                                           |                                                                                     |                                                                                  |                                                                                     |                                                                                     |                                                                                     |                                                                                     |                                                                                    |
| What splice variants are targeted?                          | refer to Table S3                                                                                                                            |                                                                                     |                                                                                  |                                                                                     |                                                                                     |                                                                                     |                                                                                     |                                                                                    |
| Item to check                                               | Sample List                                                                                                                                  |                                                                                     |                                                                                  |                                                                                     |                                                                                     |                                                                                     |                                                                                     |                                                                                    |
|                                                             | TC32 Untreated                                                                                                                               | TC32 siNegative                                                                     | TC32 siHNRNP1                                                                    | TC32 siFLU1                                                                         | TC32 DMSO                                                                           | TC32 5uM PDS                                                                        | TC32 10uM PDS                                                                       | TC32 15uM PDS                                                                      |
| <b>qPCR oligonucleotides</b>                                |                                                                                                                                              |                                                                                     |                                                                                  |                                                                                     |                                                                                     |                                                                                     |                                                                                     |                                                                                    |
| Primer sequences                                            | refer to Table S3                                                                                                                            |                                                                                     |                                                                                  |                                                                                     |                                                                                     |                                                                                     |                                                                                     |                                                                                    |
| <b>qPCR protocol</b>                                        |                                                                                                                                              |                                                                                     |                                                                                  |                                                                                     |                                                                                     |                                                                                     |                                                                                     |                                                                                    |
| Complete reaction conditions                                | 1X Fast SYBR Green Master Mix (Applied Biosystems), cDNA, and water                                                                          |                                                                                     |                                                                                  |                                                                                     |                                                                                     |                                                                                     |                                                                                     |                                                                                    |
| Reaction volume and amount of cDNA/DNA                      | 100 ng of cDNA and 20 uL reaction volume                                                                                                     |                                                                                     |                                                                                  |                                                                                     |                                                                                     |                                                                                     |                                                                                     |                                                                                    |
| Primer, (probe), Mg <sup>2+</sup> , and dNTP concentrations | 250 nM of each primer                                                                                                                        |                                                                                     |                                                                                  |                                                                                     |                                                                                     |                                                                                     |                                                                                     |                                                                                    |
| Polymerase identity and concentration                       | AmpliTaq Fast DNA Polymerase                                                                                                                 |                                                                                     |                                                                                  |                                                                                     |                                                                                     |                                                                                     |                                                                                     |                                                                                    |
| Buffer/kit identity and manufacturer                        | Fast SYBR Green Master Mix (Applied Biosystems)                                                                                              |                                                                                     |                                                                                  |                                                                                     |                                                                                     |                                                                                     |                                                                                     |                                                                                    |
| Complete thermocycling parameters (all ssamples)            | Step                                                                                                                                         | Enzyme Activation                                                                   | PCR                                                                              |                                                                                     |                                                                                     |                                                                                     |                                                                                     |                                                                                    |
|                                                             |                                                                                                                                              | Hold                                                                                | Cycles (40 cycles)                                                               |                                                                                     |                                                                                     |                                                                                     |                                                                                     |                                                                                    |
|                                                             |                                                                                                                                              | Time                                                                                | Denature                                                                         | Anneal/Extend                                                                       |                                                                                     |                                                                                     |                                                                                     |                                                                                    |
|                                                             |                                                                                                                                              | Temp (°C)                                                                           | 95                                                                               | 30 sec                                                                              | 60                                                                                  |                                                                                     |                                                                                     |                                                                                    |
| Manufacturer of qPCR instrument                             |                                                                                                                                              |                                                                                     |                                                                                  |                                                                                     |                                                                                     |                                                                                     |                                                                                     |                                                                                    |
| <b>qPCR validation</b>                                      |                                                                                                                                              |                                                                                     |                                                                                  |                                                                                     |                                                                                     |                                                                                     |                                                                                     |                                                                                    |
| Specificity (gel, sequence, melt, or digest)                | Melt                                                                                                                                         |                                                                                     |                                                                                  |                                                                                     |                                                                                     |                                                                                     |                                                                                     |                                                                                    |
| <b>Data analysis</b>                                        |                                                                                                                                              |                                                                                     |                                                                                  |                                                                                     |                                                                                     |                                                                                     |                                                                                     |                                                                                    |
| qPCR analysis program (source, version)                     | StepOne Plus Real-time PCR system                                                                                                            |                                                                                     |                                                                                  |                                                                                     |                                                                                     |                                                                                     |                                                                                     |                                                                                    |
| Method of Cq determination                                  | Applied Biosystems Relative Quantitation Analysis Module                                                                                     |                                                                                     |                                                                                  |                                                                                     |                                                                                     |                                                                                     |                                                                                     |                                                                                    |
| Outlier identification and disposition                      | OUTLIERRG (Outlier in replicate group) quality flag                                                                                          |                                                                                     |                                                                                  |                                                                                     |                                                                                     |                                                                                     |                                                                                     |                                                                                    |
| Justification of number and choice of reference genes       | One references gene with                                                                                                                     |                                                                                     |                                                                                  |                                                                                     |                                                                                     |                                                                                     |                                                                                     |                                                                                    |
| Description of normalization method                         | Comparative CT ( $\Delta\Delta CT$ ) method                                                                                                  |                                                                                     |                                                                                  |                                                                                     |                                                                                     |                                                                                     |                                                                                     |                                                                                    |
| Repeatability (intraassay variation)                        | see error bars in Figure 7A                                                                                                                  |                                                                                     |                                                                                  |                                                                                     |                                                                                     |                                                                                     |                                                                                     |                                                                                    |
| Statistical methods for results significance                | Multiple comparisons using Bonferroni-Dunn method                                                                                            |                                                                                     |                                                                                  |                                                                                     |                                                                                     |                                                                                     |                                                                                     |                                                                                    |
| Software (source, version)                                  | Applied Biosystems Relative Quantitation Analysis Module and GraphPad Prism 7                                                                |                                                                                     |                                                                                  |                                                                                     |                                                                                     |                                                                                     |                                                                                     |                                                                                    |

**Table S7: qPCR additional experimental details**

| Related to Figure 7F                            |                                                                                                           |                                                                 |                                                     |                                                    |
|-------------------------------------------------|-----------------------------------------------------------------------------------------------------------|-----------------------------------------------------------------|-----------------------------------------------------|----------------------------------------------------|
| Item to check                                   | Sample List                                                                                               |                                                                 |                                                     |                                                    |
|                                                 | TC32 DMSO                                                                                                 | TC32 10 uM PDS                                                  | TC32 siNegative                                     | TC32 siHNRNPH1                                     |
| <b>Experimental design</b>                      |                                                                                                           |                                                                 |                                                     |                                                    |
| Definition of experimental and control groups   | Control group                                                                                             | Experimental group                                              | Control group                                       | Experimental group                                 |
| Number within each group                        | n = 3                                                                                                     | n = 3                                                           | n = 3                                               | n = 3                                              |
| <b>Sample</b>                                   |                                                                                                           |                                                                 |                                                     |                                                    |
| Description                                     | TC32 cells treated with DMSO for 72 hours                                                                 | TC32 cells treated with 10 micromolar pyridostatin for 72 hours | TC32 cells transfected with siNegative for 72 hours | TC32 cells transfected with siHNRNPH1 for 72 hours |
| Processing procedure                            | Cells were harvested by trypsinization 72 hours after treatment                                           |                                                                 |                                                     |                                                    |
| If frozen, how and how quickly?                 | Flash Frozen                                                                                              |                                                                 |                                                     |                                                    |
| Sample storage conditions and duration          | Stored in -80C for 5 days                                                                                 |                                                                 |                                                     |                                                    |
| <b>Nucleic acid extraction</b>                  |                                                                                                           |                                                                 |                                                     |                                                    |
| Procedure and/or instrumentation                | Promega Maxwell 16 LEV System                                                                             |                                                                 |                                                     |                                                    |
| Name of kit and details of any modifications    | Maxwell 16 LEV simplyRNA Purification Kits                                                                |                                                                 |                                                     |                                                    |
| Details of DNase or RNase treatment             | Dnase treatment was automated                                                                             |                                                                 |                                                     |                                                    |
| Nucleic acid quantification                     | Replicate 1: 886.76 ng/uL                                                                                 | Replicate 1: 204.88 ng/uL                                       | Replicate 1: 876.96 ng/uL                           | Replicate 1: 119.11 ng/uL                          |
|                                                 | Replicate 2: 962.94 ng/uL                                                                                 | Replicate 2: 241.41 ng/uL                                       | Replicate 2: 974.38 ng/uL                           | Replicate 2: 136.93 ng/uL                          |
|                                                 | Replicate 3: 1050.86 ng/uL                                                                                | Replicate 3: 260.64 ng/uL                                       | Replicate 3: 887.18 ng/uL                           | Replicate 3: 136.09 ng/uL                          |
| Instrument and method                           | Nanodrop Nucleic Acid Quantification                                                                      |                                                                 |                                                     |                                                    |
| Purity (A260/A280)                              | Replicate 1: 2.17                                                                                         | Replicate 1: 2.16                                               | Replicate 1: 2.16                                   | Replicate 1: 2.15                                  |
|                                                 | Replicate 2: 2.17                                                                                         | Replicate 2: 2.17                                               | Replicate 2: 2.18                                   | Replicate 2: 2.17                                  |
|                                                 | Replicate 3: 2.17                                                                                         | Replicate 3: 2.17                                               | Replicate 3: 2.17                                   | Replicate 3: 2.16                                  |
| RNA integrity: method/instrument                | Nanodrop                                                                                                  |                                                                 |                                                     |                                                    |
| <b>Reverse transcription</b>                    |                                                                                                           |                                                                 |                                                     |                                                    |
| Complete reaction conditions                    | 1X iScript Reverse Transcription Supermix containing oligo(dT) and random primers (Biorad), RNA and water |                                                                 |                                                     |                                                    |
| Amount of RNA and reaction volume               | 1000 ng of RNA and 20 uL reaction volume                                                                  |                                                                 |                                                     |                                                    |
| Reverse transcriptase and concentration         | 1X iScript Reverse Transcriptase                                                                          |                                                                 |                                                     |                                                    |
| Temperature and time                            | Priming: 5 min at 25C                                                                                     |                                                                 |                                                     |                                                    |
|                                                 | Reverse transcription: 20 min at 46C                                                                      |                                                                 |                                                     |                                                    |
|                                                 | Reverse transcription inactivation: 1 min at 95C                                                          |                                                                 |                                                     |                                                    |
| <b>qPCR target information</b>                  |                                                                                                           |                                                                 |                                                     |                                                    |
| Gene symbol                                     | refer to Table S3                                                                                         |                                                                 |                                                     |                                                    |
| Sequence accession number                       |                                                                                                           |                                                                 |                                                     |                                                    |
| Amplicon length                                 |                                                                                                           |                                                                 |                                                     |                                                    |
| In silico specificity screen (BLAST, and so on) | UCSC In-Silico PCR                                                                                        |                                                                 |                                                     |                                                    |
| What splice variants are targeted?              | refer to Table S3                                                                                         |                                                                 |                                                     |                                                    |

  

| Item to check                                               | Sample List                                                                                                    |                   |                    |                |
|-------------------------------------------------------------|----------------------------------------------------------------------------------------------------------------|-------------------|--------------------|----------------|
|                                                             | TC32 DMSO                                                                                                      | TC32 10 uM PDS    | TC32 siNegative    | TC32 siHNRNPH1 |
| <b>qPCR oligonucleotides</b>                                |                                                                                                                |                   |                    |                |
| Primer sequences                                            | refer to Table S3                                                                                              |                   |                    |                |
| <b>qPCR protocol</b>                                        |                                                                                                                |                   |                    |                |
| Complete reaction conditions                                | 1X Fast SYBR Green Master Mix (Applied Biosystems), cDNA, and water                                            |                   |                    |                |
| Reaction volume and amount of cDNA/DNA                      | 100 ng of cDNA and 20 uL reaction volume                                                                       |                   |                    |                |
| Primer, (probe), Mg <sup>2+</sup> , and dNTP concentrations | 250 nM of each primer                                                                                          |                   |                    |                |
| Polymerase identity and concentration                       | AmpliAq Fast DNA Polymerase                                                                                    |                   |                    |                |
| Buffer/kit identity and manufacturer                        | Fast SYBR Green Master Mix (Applied Biosystems)                                                                |                   |                    |                |
| Complete thermocycling parameters                           | Step                                                                                                           | Enzyme Activation | PCR                |                |
|                                                             |                                                                                                                | Hold              | Cycles (40 cycles) |                |
|                                                             | Time                                                                                                           | 20 sec            | Denature           | Anneal/Extend  |
|                                                             | Temp (°C)                                                                                                      | 95                | 3 sec              | 30 sec         |
| Manufacturer of qPCR instrument                             | StepOne Plus Real-time PCR system                                                                              |                   |                    |                |
| <b>qPCR validation</b>                                      |                                                                                                                |                   |                    |                |
| Specificity (gel, sequence, melt, or digest)                | Melt                                                                                                           |                   |                    |                |
| <b>Data analysis</b>                                        |                                                                                                                |                   |                    |                |
| qPCR analysis program (source, version)                     | StepOne Plus Real-time PCR system                                                                              |                   |                    |                |
| Method of C <sub>q</sub> determination                      | Applied Biosystems Relative Quantitation Analysis Module                                                       |                   |                    |                |
| Outlier identification and disposition                      | OUTLIERRG (Outlier in replicate group) quality flag                                                            |                   |                    |                |
| Justification of number and choice of reference genes       | Two references genes with minimal standard deviation between replicates and upon treatment were utilized for   |                   |                    |                |
| Description of normalization method                         | Comparative CT ( $\Delta\Delta CT$ ) method                                                                    |                   |                    |                |
| Repeatability (intraassay variation)                        | see error bars in Figure 7F                                                                                    |                   |                    |                |
| Statistical methods for results significance                | Multiple comparisons by controlling the False Discovery Rate - Two-stage linear set-up procedure of Benjamini, |                   |                    |                |
| Software (source, version)                                  | Applied Biosystems Relative Quantitation Analysis Module and GraphPad Prism 7                                  |                   |                    |                |

Table S7: qPCR additional experimental details

| Related to Figure S1A                                |                                                                                                                   |                                                                                     |                                                                                     |                                                                                     |                                                                                     |                                                                                     |                                                                                   |                                                                                    |
|------------------------------------------------------|-------------------------------------------------------------------------------------------------------------------|-------------------------------------------------------------------------------------|-------------------------------------------------------------------------------------|-------------------------------------------------------------------------------------|-------------------------------------------------------------------------------------|-------------------------------------------------------------------------------------|-----------------------------------------------------------------------------------|------------------------------------------------------------------------------------|
| Item to check                                        | Sample List                                                                                                       |                                                                                     |                                                                                     |                                                                                     |                                                                                     |                                                                                     |                                                                                   |                                                                                    |
|                                                      | HEK-293T siNegative                                                                                               | HEK-293T siHNRNPH1                                                                  | SKNMC siNegative                                                                    | SKNMC siHNRNPH1                                                                     | TC71 siNegative                                                                     | TC71 siHNRNPH1                                                                      | RDES siNegative                                                                   | RDES siHNRNPH1                                                                     |
| <b>Experimental design</b>                           |                                                                                                                   |                                                                                     |                                                                                     |                                                                                     |                                                                                     |                                                                                     |                                                                                   |                                                                                    |
| Definition of experimental and control groups        | Control group                                                                                                     | Experimental group                                                                  | Control group                                                                       | Experimental group                                                                  | Control group                                                                       | Experimental group                                                                  | Control group                                                                     | Experimental group                                                                 |
| Number within each group                             | n = 3                                                                                                             | n = 3                                                                               | n = 3                                                                               | n = 3                                                                               | n = 3                                                                               | n = 3                                                                               | n = 3                                                                             | n = 3                                                                              |
| <b>Sample</b>                                        |                                                                                                                   |                                                                                     |                                                                                     |                                                                                     |                                                                                     |                                                                                     |                                                                                   |                                                                                    |
| Description                                          | HEK-293T transfected with siNegative cells for 48 hours                                                           | HEK-293T cells transfected with siHNRNPH1 for 48 hours                              | SKNMC transfected with siNegative cells for 48 hours                                | SKNMC cells transfected with siHNRNPH1 for 48 hours                                 | TC71 transfected with siNegative cells for 48 hours                                 | TC71 cells transfected with siHNRNPH1 for 48 hours                                  | RDES transfected with siNegative cells for 48 hours                               | RDES cells transfected with siHNRNPH1 for 48 hours                                 |
| Processing procedure                                 | Cells were harvested by trypsinization 48 hour after treatment                                                    |                                                                                     |                                                                                     |                                                                                     |                                                                                     |                                                                                     |                                                                                   |                                                                                    |
| If frozen, how and how quickly?                      | Flash Frozen                                                                                                      |                                                                                     |                                                                                     |                                                                                     |                                                                                     |                                                                                     |                                                                                   |                                                                                    |
| Sample storage conditions and duration               | Stored in -80C for 1-3 days                                                                                       |                                                                                     |                                                                                     |                                                                                     |                                                                                     |                                                                                     |                                                                                   |                                                                                    |
| <b>Nucleic acid extraction</b>                       |                                                                                                                   |                                                                                     |                                                                                     |                                                                                     |                                                                                     |                                                                                     |                                                                                   |                                                                                    |
| Procedure and/or instrumentation                     | Promega Maxwell 16 LEV System                                                                                     |                                                                                     |                                                                                     |                                                                                     |                                                                                     |                                                                                     |                                                                                   |                                                                                    |
| Name of kit and details of any modifications         | Maxwell 16 LEV simplyRNA Purification Kits                                                                        |                                                                                     |                                                                                     |                                                                                     |                                                                                     |                                                                                     |                                                                                   |                                                                                    |
| Details of DNase or RNase treatment                  | Dnase treatment was automated                                                                                     |                                                                                     |                                                                                     |                                                                                     |                                                                                     |                                                                                     |                                                                                   |                                                                                    |
| Nucleic acid quantification                          | Replicate 1: 782.11 ng/uL<br>Replicate 2: 782.33 ng/uL<br>Replicate 3: 701.91 ng/uL                               | Replicate 1: 788.14 ng/uL<br>Replicate 2: 825.52 ng/uL<br>Replicate 3: 826.23 ng/uL | Replicate 1: 271.18 ng/uL<br>Replicate 2: 323.17 ng/uL<br>Replicate 3: 262.22 ng/uL | Replicate 1: 132.25 ng/uL<br>Replicate 2: 176.52 ng/uL<br>Replicate 3: 196.52 ng/uL | Replicate 1: 304.84 ng/uL<br>Replicate 2: 285.77 ng/uL<br>Replicate 3: 301.19 ng/uL | Replicate 1: 224.66 ng/uL<br>Replicate 2: 222.39 ng/uL<br>Replicate 3: 200.04 ng/uL | Replicate 1: 792.1 ng/uL<br>Replicate 2: 910.4 ng/uL<br>Replicate 3: 893.85 ng/uL | Replicate 1: 698.13 ng/uL<br>Replicate 2: 830.03 ng/uL<br>Replicate 3: 907.4 ng/uL |
| Instrument and method                                | Nanodrop Nucleic Acid Quantification                                                                              |                                                                                     |                                                                                     |                                                                                     |                                                                                     |                                                                                     |                                                                                   |                                                                                    |
| Purity (A260/A280)                                   | Replicate 1: 2.15<br>Replicate 2: 2.16<br>Replicate 3: 2.16                                                       | Replicate 1: 2.17<br>Replicate 2: 2.15<br>Replicate 3: 2.16                         | Replicate 1: 2.11<br>Replicate 2: 2.06<br>Replicate 3: 2.12                         | Replicate 1: 2.04<br>Replicate 2: 2.1<br>Replicate 3: 2.07                          | Replicate 1: 2.13<br>Replicate 2: 2.12<br>Replicate 3: 2.13                         | Replicate 1: 2.15<br>Replicate 2: 2.14<br>Replicate 3: 2.14                         | Replicate 1: 2.17<br>Replicate 2: 2.17<br>Replicate 3: 2.17                       | Replicate 1: 2.16<br>Replicate 2: 2.16<br>Replicate 3: 2.16                        |
| RNA integrity: method/instrument                     | Nanodrop                                                                                                          |                                                                                     |                                                                                     |                                                                                     |                                                                                     |                                                                                     |                                                                                   |                                                                                    |
| <b>Reverse transcription</b>                         |                                                                                                                   |                                                                                     |                                                                                     |                                                                                     |                                                                                     |                                                                                     |                                                                                   |                                                                                    |
| Complete reaction conditions                         | 1X iScript Reverse Transcription Supermix containing oligo(dT) and random primers (Biorad), RNA and water         |                                                                                     |                                                                                     |                                                                                     |                                                                                     |                                                                                     |                                                                                   |                                                                                    |
| Amount of RNA and reaction volume                    | 1000 ng of RNA and 20 uL reaction volume                                                                          |                                                                                     |                                                                                     |                                                                                     |                                                                                     |                                                                                     |                                                                                   |                                                                                    |
| Reverse transcriptase and concentration              | 1X iScript Reverse Transcriptase                                                                                  |                                                                                     |                                                                                     |                                                                                     |                                                                                     |                                                                                     |                                                                                   |                                                                                    |
| Temperature and time                                 | Priming: 5 min at 25C<br>Reverse transcription: 20 min at 46C<br>Reverse transcription inactivation: 1 min at 95C |                                                                                     |                                                                                     |                                                                                     |                                                                                     |                                                                                     |                                                                                   |                                                                                    |
| <b>qPCR target information</b>                       |                                                                                                                   |                                                                                     |                                                                                     |                                                                                     |                                                                                     |                                                                                     |                                                                                   |                                                                                    |
| Gene symbol                                          |                                                                                                                   |                                                                                     |                                                                                     |                                                                                     |                                                                                     |                                                                                     |                                                                                   |                                                                                    |
| Sequence accession number                            | refer to Table S3                                                                                                 |                                                                                     |                                                                                     |                                                                                     |                                                                                     |                                                                                     |                                                                                   |                                                                                    |
| Amplicon length                                      |                                                                                                                   |                                                                                     |                                                                                     |                                                                                     |                                                                                     |                                                                                     |                                                                                   |                                                                                    |
| In silico specificity screen (BLAST, and so on)      | UCSC In-Silico PCR                                                                                                |                                                                                     |                                                                                     |                                                                                     |                                                                                     |                                                                                     |                                                                                   |                                                                                    |
| What splice variants are targeted?                   | refer to Table S3                                                                                                 |                                                                                     |                                                                                     |                                                                                     |                                                                                     |                                                                                     |                                                                                   |                                                                                    |
| <b>Sample List</b>                                   |                                                                                                                   |                                                                                     |                                                                                     |                                                                                     |                                                                                     |                                                                                     |                                                                                   |                                                                                    |
| Item to check                                        | HEK-293T siNegative                                                                                               | HEK-293T siHNRNPH1                                                                  | SKNMC siNegative                                                                    | SKNMC siHNRNPH1                                                                     | TC71 siNegative                                                                     | TC71 siHNRNPH1                                                                      | RDES siNegative                                                                   | RDES siHNRNPH1                                                                     |
|                                                      |                                                                                                                   |                                                                                     |                                                                                     |                                                                                     |                                                                                     |                                                                                     |                                                                                   |                                                                                    |
| <b>qPCR oligonucleotides</b>                         |                                                                                                                   |                                                                                     |                                                                                     |                                                                                     |                                                                                     |                                                                                     |                                                                                   |                                                                                    |
| Primer sequences                                     | refer to Table S3                                                                                                 |                                                                                     |                                                                                     |                                                                                     |                                                                                     |                                                                                     |                                                                                   |                                                                                    |
| <b>qPCR protocol</b>                                 |                                                                                                                   |                                                                                     |                                                                                     |                                                                                     |                                                                                     |                                                                                     |                                                                                   |                                                                                    |
| Complete reaction conditions                         | 1X Fast SYBR Green Master Mix (Applied Biosystems), cDNA, and water                                               |                                                                                     |                                                                                     |                                                                                     |                                                                                     |                                                                                     |                                                                                   |                                                                                    |
| Reaction volume and amount of cDNA/DNA               | 100 ng of cDNA and 20 uL reaction volume                                                                          |                                                                                     |                                                                                     |                                                                                     |                                                                                     |                                                                                     |                                                                                   |                                                                                    |
| Primer, (probe), Mg2+, and dNTP concentrations       | 250 nM of each primer                                                                                             |                                                                                     |                                                                                     |                                                                                     |                                                                                     |                                                                                     |                                                                                   |                                                                                    |
| Polymerase identity and concentration                | AmpliTag Fast DNA Polymerase                                                                                      |                                                                                     |                                                                                     |                                                                                     |                                                                                     |                                                                                     |                                                                                   |                                                                                    |
| Buffer/kit identity and manufacturer                 | Fast SYBR Green Master Mix (Applied Biosystems)                                                                   |                                                                                     |                                                                                     |                                                                                     |                                                                                     |                                                                                     |                                                                                   |                                                                                    |
| Complete thermocycling parameters (all samples)      | Step                                                                                                              | Enzyme Activation                                                                   | PCR Cycles (40 cycles)                                                              |                                                                                     |                                                                                     |                                                                                     |                                                                                   |                                                                                    |
|                                                      |                                                                                                                   | Hold                                                                                |                                                                                     |                                                                                     |                                                                                     |                                                                                     |                                                                                   |                                                                                    |
|                                                      |                                                                                                                   |                                                                                     | Denature                                                                            | Anneal/Extend                                                                       |                                                                                     |                                                                                     |                                                                                   |                                                                                    |
|                                                      | Time                                                                                                              | 20 sec                                                                              | 3 sec                                                                               | 30 sec                                                                              |                                                                                     |                                                                                     |                                                                                   |                                                                                    |
|                                                      | Temp (°C)                                                                                                         | 95                                                                                  | 95                                                                                  | 60                                                                                  |                                                                                     |                                                                                     |                                                                                   |                                                                                    |
| Manufacturer of qPCR instrument                      |                                                                                                                   |                                                                                     |                                                                                     |                                                                                     |                                                                                     |                                                                                     |                                                                                   |                                                                                    |
| <b>qPCR validation</b>                               |                                                                                                                   |                                                                                     |                                                                                     |                                                                                     |                                                                                     |                                                                                     |                                                                                   |                                                                                    |
| Specificity (gel, sequence, melt, or digest)         | Melt                                                                                                              |                                                                                     |                                                                                     |                                                                                     |                                                                                     |                                                                                     |                                                                                   |                                                                                    |
| <b>Data analysis</b>                                 |                                                                                                                   |                                                                                     |                                                                                     |                                                                                     |                                                                                     |                                                                                     |                                                                                   |                                                                                    |
| qPCR analysis program (source, version)              | StepOne Plus Real-time PCR system                                                                                 |                                                                                     |                                                                                     |                                                                                     |                                                                                     |                                                                                     |                                                                                   |                                                                                    |
| Method of Cq determination                           | Applied Biosystems Relative Quantitation Analysis Module                                                          |                                                                                     |                                                                                     |                                                                                     |                                                                                     |                                                                                     |                                                                                   |                                                                                    |
| Outlier identification and disposition               | OUTLIERRG (Outlier in replicate group) quality flag                                                               |                                                                                     |                                                                                     |                                                                                     |                                                                                     |                                                                                     |                                                                                   |                                                                                    |
| Justification of number and choice of reference gene | One references gene with                                                                                          |                                                                                     |                                                                                     |                                                                                     |                                                                                     |                                                                                     |                                                                                   |                                                                                    |
| Description of normalization method                  | Comparative CT (ΔΔCT) method                                                                                      |                                                                                     |                                                                                     |                                                                                     |                                                                                     |                                                                                     |                                                                                   |                                                                                    |
| Repeatability (intraassay variation)                 | see error bars in Figure S1A                                                                                      |                                                                                     |                                                                                     |                                                                                     |                                                                                     |                                                                                     |                                                                                   |                                                                                    |
| Statistical methods for results significance         | Multiple comparisons using Bonferroni-Dunn method                                                                 |                                                                                     |                                                                                     |                                                                                     |                                                                                     |                                                                                     |                                                                                   |                                                                                    |
| Software (source, version)                           | Applied Biosystems Relative Quantitation Analysis Module and GraphPad Prism 7                                     |                                                                                     |                                                                                     |                                                                                     |                                                                                     |                                                                                     |                                                                                   |                                                                                    |

**Table S7: qPCR additional experimental details**

| Related to Figure S7B                                 |                                                                                                                   |                                                                                     |                                                                                     |                                                                                  |
|-------------------------------------------------------|-------------------------------------------------------------------------------------------------------------------|-------------------------------------------------------------------------------------|-------------------------------------------------------------------------------------|----------------------------------------------------------------------------------|
| Item to check                                         | Sample List                                                                                                       |                                                                                     |                                                                                     |                                                                                  |
|                                                       | TC32 DMSO                                                                                                         | TC32 10 uM PDS                                                                      | TC32 siNegative                                                                     | TC32 siHNRNP1                                                                    |
| <b>Experimental design</b>                            |                                                                                                                   |                                                                                     |                                                                                     |                                                                                  |
| Definition of experimental and control groups         | Control group                                                                                                     | Experimental group                                                                  | Control group                                                                       | Experimental group                                                               |
| Number within each group                              | n = 3                                                                                                             | n = 3                                                                               | n = 3                                                                               | n = 3                                                                            |
| <b>Sample</b>                                         |                                                                                                                   |                                                                                     |                                                                                     |                                                                                  |
| Description                                           | TC32 cells treated with DMSO for 48 hours                                                                         | TC32 cells treated with 10 micromolar pyridostatin for 48 hours                     | TC32 cells transfected with siNegative for 48 hours                                 | TC32 cells transfected with siHNRNP1 for 48 hours                                |
| Processing procedure                                  | Cells were harvested by trypsinization 48 hours after treatment                                                   |                                                                                     |                                                                                     |                                                                                  |
| If frozen, how and how quickly?                       | Flash Frozen                                                                                                      |                                                                                     |                                                                                     |                                                                                  |
| Sample storage conditions and duration                | Stored in -80C for 6 days                                                                                         |                                                                                     |                                                                                     |                                                                                  |
| <b>Nucleic acid extraction</b>                        |                                                                                                                   |                                                                                     |                                                                                     |                                                                                  |
| Procedure and/or instrumentation                      | Promega Maxwell 16 LEV System                                                                                     |                                                                                     |                                                                                     |                                                                                  |
| Name of kit and details of any modifications          | Maxwell 16 LEV simplyRNA Purification Kits                                                                        |                                                                                     |                                                                                     |                                                                                  |
| Details of DNase or RNase treatment                   | Dnase treatment was automated                                                                                     |                                                                                     |                                                                                     |                                                                                  |
| Nucleic acid quantification                           | Replicate 1: 731.69 ng/uL<br>Replicate 2: 720.51 ng/uL<br>Replicate 3: 726.33 ng/uL                               | Replicate 1: 201.47 ng/uL<br>Replicate 2: 220.72 ng/uL<br>Replicate 3: 246.76 ng/uL | Replicate 1: 682.26 ng/uL<br>Replicate 2: 654.15 ng/uL<br>Replicate 3: 714.49 ng/uL | Replicate 1: 163 ng/uL<br>Replicate 2: 167.39 ng/uL<br>Replicate 3: 168.44 ng/uL |
| Instrument and method                                 | Nanodrop Nucleic Acid Quantification                                                                              |                                                                                     |                                                                                     |                                                                                  |
| Purity (A260/A280)                                    | Replicate 1: 2.16<br>Replicate 2: 2.17<br>Replicate 3: 2.16                                                       | Replicate 1: 2.18<br>Replicate 2: 2.15<br>Replicate 3: 2.15                         | Replicate 1: 2.15<br>Replicate 2: 2.16<br>Replicate 3: 2.17                         | Replicate 1: 2.17<br>Replicate 2: 2.18<br>Replicate 3: 2.14                      |
| RNA integrity: method/instrument                      | Nanodrop                                                                                                          |                                                                                     |                                                                                     |                                                                                  |
| <b>Reverse transcription</b>                          |                                                                                                                   |                                                                                     |                                                                                     |                                                                                  |
| Complete reaction conditions                          | 1X iScript Reverse Transcription Supermix containing oligo(dT) and random primers (Biorad), RNA and water         |                                                                                     |                                                                                     |                                                                                  |
| Amount of RNA and reaction volume                     | 1000 ng of RNA and 20 uL reaction volume                                                                          |                                                                                     |                                                                                     |                                                                                  |
| Reverse transcriptase and concentration               | 1X iScript Reverse Transcriptase                                                                                  |                                                                                     |                                                                                     |                                                                                  |
| Temperature and time                                  | Priming: 5 min at 25C<br>Reverse transcription: 20 min at 46C<br>Reverse transcription inactivation: 1 min at 95C |                                                                                     |                                                                                     |                                                                                  |
| <b>qPCR target information</b>                        |                                                                                                                   |                                                                                     |                                                                                     |                                                                                  |
| Gene symbol                                           | refer to Table S3                                                                                                 |                                                                                     |                                                                                     |                                                                                  |
| Sequence accession number                             |                                                                                                                   |                                                                                     |                                                                                     |                                                                                  |
| Amplicon length                                       |                                                                                                                   |                                                                                     |                                                                                     |                                                                                  |
| In silico specificity screen (BLAST, and so on)       | UCSC In-Silico PCR                                                                                                |                                                                                     |                                                                                     |                                                                                  |
| What splice variants are targeted?                    | refer to Table S3                                                                                                 |                                                                                     |                                                                                     |                                                                                  |
| Related to Figure S7B                                 |                                                                                                                   |                                                                                     |                                                                                     |                                                                                  |
| Item to check                                         | Sample List                                                                                                       |                                                                                     |                                                                                     |                                                                                  |
|                                                       | TC32 DMSO                                                                                                         | TC32 10 uM PDS                                                                      | TC32 siNegative                                                                     | TC32 siHNRNP1                                                                    |
| <b>qPCR oligonucleotides</b>                          |                                                                                                                   |                                                                                     |                                                                                     |                                                                                  |
| Primer sequences                                      | refer to Table S3                                                                                                 |                                                                                     |                                                                                     |                                                                                  |
| <b>qPCR protocol</b>                                  |                                                                                                                   |                                                                                     |                                                                                     |                                                                                  |
| Complete reaction conditions                          | 1X Fast SYBR Green Master Mix (Applied Biosystems), cDNA, and water                                               |                                                                                     |                                                                                     |                                                                                  |
| Reaction volume and amount of cDNA/DNA                | 100 ng of cDNA and 20 uL reaction volume                                                                          |                                                                                     |                                                                                     |                                                                                  |
| Primer, (probe), Mg2+, and dNTP concentrations        | 250 nM of each primer                                                                                             |                                                                                     |                                                                                     |                                                                                  |
| Polymerase identity and concentration                 | AmpliAq Fast DNA Polymerase                                                                                       |                                                                                     |                                                                                     |                                                                                  |
| Buffer/kit identity and manufacturer                  | Fast SYBR Green Master Mix (Applied Biosystems)                                                                   |                                                                                     |                                                                                     |                                                                                  |
| Complete thermocycling parameters                     | <i>Step</i>                                                                                                       | <i>Enzyme Activation</i>                                                            | <i>PCR</i>                                                                          |                                                                                  |
|                                                       |                                                                                                                   | Hold                                                                                | Cycles (40 cycles)                                                                  |                                                                                  |
|                                                       |                                                                                                                   |                                                                                     | Denature                                                                            | Anneal/Extend                                                                    |
|                                                       | Time                                                                                                              | 20 sec                                                                              | 3 sec                                                                               | 30 sec                                                                           |
|                                                       | Temp (°C)                                                                                                         | 95                                                                                  | 95                                                                                  | 60                                                                               |
| Manufacturer of qPCR instrument                       | StepOne Plus Real-time PCR system                                                                                 |                                                                                     |                                                                                     |                                                                                  |
| <b>qPCR validation</b>                                |                                                                                                                   |                                                                                     |                                                                                     |                                                                                  |
| Specificity (gel, sequence, melt, or digest)          | Melt                                                                                                              |                                                                                     |                                                                                     |                                                                                  |
| <b>Data analysis</b>                                  |                                                                                                                   |                                                                                     |                                                                                     |                                                                                  |
| qPCR analysis program (source, version)               | StepOne Plus Real-time PCR system                                                                                 |                                                                                     |                                                                                     |                                                                                  |
| Method of Cq determination                            | Applied Biosystems Relative Quantitation Analysis Module                                                          |                                                                                     |                                                                                     |                                                                                  |
| Outlier identification and disposition                | OUTLIERRG (Outlier in replicate group) quality flag                                                               |                                                                                     |                                                                                     |                                                                                  |
| Justification of number and choice of reference genes | Two reference genes with minimal standard deviation between replicates and upon treatment were utilized for       |                                                                                     |                                                                                     |                                                                                  |
| Description of normalization method                   | Comparative CT ( $\Delta\Delta CT$ ) method                                                                       |                                                                                     |                                                                                     |                                                                                  |
| Repeatability (intraassay variation)                  | see error bars in Figure S7B                                                                                      |                                                                                     |                                                                                     |                                                                                  |
| Statistical methods for results significance          | Multiple comparisons by controlling the False Discovery Rate - Two-stage linear set-up procedure of Benjamini,    |                                                                                     |                                                                                     |                                                                                  |
| Software (source, version)                            | Applied Biosystems Relative Quantitation Analysis Module and GraphPad Prism 7                                     |                                                                                     |                                                                                     |                                                                                  |
